# Supplementary material for: Transcriptomic and metabolomic profiling reveals the effect of LED light quality on morphological traits, and phenylpropanoid-derived compounds accumulation in Sarcandra glabra seedlings
Source: BMC Plant Biol. 2020 Oct 15;20:476. doi: 10.1186/s12870-020-02685-w (PMC7574309; doi:10.1186/s12870-020-02685-w)
Supplement: Supplementary file 7 — Additional file 7: Table S4. The statistics of the detected metabolites in S. glabra. [file 12870_2020_2685_MOESM7_ESM.xlsx]

## Sheet: Sheet1
Index	Q1 (Da)	Rt (min)	Molecular Weight (Da)	Formula	Ionization model	Compounds	Class I	Class II	CAS	Level	BY1	BY2	BY3	RY1	RY2	RY3	WG1	WG2	WG3	WY1	WY2	WY3	mix01	mix02	mix03	mix04	cpd_ID	kegg_map
GQ512002	623.1	4.4	624.14	C28H32O16	[M-H]-	Isorhamnetin-3-O-rutinoside	Flavonoids	Flavonols	604-80-8	B	12569	14899	7548.2	6828.2	4736.4	7077.4	9	9	9	7442.1	11910	8252	3950.9	6320.6	4229	8406.8	--	--
GQ512003	307.18	3.05	306.152	C15H22O3N4	[M+H]+	Fer-agmatine	Alkaloids	Phenolamine	-	B	67342	92215	74426	74780	69724	59710	1861.2	1899	3000.4	64209	76162	26400	35104	33470	29521	31996	--	--
GQ512005	595.16	4.32	594.132	C27H30O15	[M+H]+	Kaempferol-3-O-glucoside-7-O-rhamnoside	Flavonoids	Flavonols	-	B	85759	113480	67651	12881	14285	9719.2	6040.4	7030.4	5697.4	33185	26042	61509	28195	25653	21613	25670	--	--
GQ512006	611.16	4.09	610.126	C27H30O16	[M+H]+	Quercetin-3-O-glucoside-7-O-rhamnoside	Flavonoids	Flavonols	-	B	169940	124380	111900	45669	40107	39822	9	9	9	62014	53683	95557	47028	47906	57327	63642	--	--
Li512115	515.12	4.66	516.105	C25H24O12	[M-H]-	3,4-Dicaffeoylquinic acid	Phenolic acids	Phenolic acids	14534-61-3	A	3147200	1511600	4247400	1441600	1383900	1608300	98896	72355	455660	1243600	1798900	5633300	1157400	1220800	1192800	1268100	--	--
Li512117	611.16	4.39	610.126	C27H30O16	[M+H]+	Quercetin 3-O-rhanosylgalactoside	Flavonoids	Flavonols	-	A	3894.1	1605.1	5529.7	1797.6	2015	2973.1	41549	38462	40618	5732.4	1645.3	3468.8	35254	34727	37841	35225	--	--
Qingke_Rfmb087-1-1	311.22	6.51	312.208	C18H32O4	[M-H]-	13-Oxo-9-hydroxy-10-octadecenoic acid	Lipids	Free fatty acids	-	B	4337.1	4760.4	2852.9	3923.9	3975.3	3327.1	204210	236640	218070	3262.2	6242.3	3915.8	118740	114570	123480	115960	--	--
Qingke_Rfmb089-2-3	313.24	6.48	314.222	C18H34O4	[M-H]-	9,10-Dihydroxy-12-octadecenoic acid	Lipids	Free fatty acids	263399-34-4	A	164310	163860	97984	49376	95028	72303	1797.7	2323.9	1984.7	63800	97948	69129	45964	44680	45759	48204	--	--
Qingke_Rfmb090-1-3	295.23	8.03	296.214	C18H32O3	[M-H]-	13-Hydroxy-9,11-octadecadienoic acid	Lipids	Free fatty acids	5204-88-6	A	371500	298200	288620	233450	503410	262880	851550	1107100	1111400	242770	475940	353460	1294200	1402500	1400800	1395000	--	--
Qingke_Rfmb091-1-1	295.23	8.03	296.214	C18H32O3	[M-H]-	9-Hydroxy-10,12-octadecadienoic acid	Lipids	Free fatty acids	15514-85-9	A	376910	305630	298210	238460	503930	253040	869150	1106800	1094500	241720	487630	338580	1324600	1311600	1428900	1346700	--	--
Qingke_Rfmb257-der14-2	561.2	4.94	562.177	C28H34O12	[M-H]-	Pinoresinol-acetylglucose	Lignans and Coumarins	Lignans	-	A	43045	38567	34100	27595	23513	28906	399320	376510	419390	29333	51550	31655	140900	139790	104090	150680	--	--
Qingke_Rfmb318-1-2	144.1	1.39	144.092	C7H14NO2+	[M]+	Proline βine(ProBet)	Amino acids and derivatives	Amino acids and derivatives	1195-94-4	B	7025.4	13354	4741.7	12016	10112	7606.4	36415	33487	36227	13036	12943	17290	14663	15910	18421	18750	--	--
Qingke_Rfmb319-1-2	130.09	1.41	129.07	C6H11NO2	[M+H]+	Pipecolic acid	Amino acids and derivatives	Amino acids and derivatives	4043-87-2	A	16266	13299	6503.4	68850	54635	50074	836440	786500	712880	27469	54839	38370	313620	259990	257250	324050	--	--
YC512113	339.15	1.36	338.13	C16H22N2O6	[M+H]+	Cotinine-Hexose	Alkaloids	Alkaloids	-	B	95104	96249	86179	46208	50223	57900	16509	19295	22538	98757	79514	72554	58608	51059	50144	40708	--	--
YC512115	325.18	1.33	324.132	C19H20N2O3	[M+H]+	Nicotine-Hex	Alkaloids	Alkaloids	-	B	19831	16639	18403	20832	23417	24695	29862	27991	30271	27421	23131	17273	28435	20703	25277	19954	--	--
YC512118	282.28	10.19	281.249	C18H35NO	[M+H]+	Octadecenoic amide	Others	Others	-	A	183390	106590	84961	23481	71312	86460	95525	76450	79944	63006	69393	73125	67970	65331	68435	63670	--	--
mws0001	133.05	1.24	132.046	C4H8N2O3	[M+H]+	L-Asparagine Anhydrous	Amino acids and derivatives	Amino acids and derivatives	70-47-3	B	4563.3	8007.2	4179.8	5096	6451.6	10944	117530	303420	793850	8588.2	6407.1	7772.3	111290	86604	93686	55100	C00152	ko00250,ko00460,ko00970,ko01100,ko01110,ko01230
mws0005	161.1	3.22	160.091	C10H12N2	[M+H]+	Tryptamine	Alkaloids	Plumerane	61-54-1	B	467430	329590	414480	823050	455450	402960	57754	142360	149350	620580	689850	624770	410550	348000	371960	316300	C00398	ko00380,ko00901,ko01100,ko01110
mws0008	149.07	5.77	150.061	C9H10O2	[M-H]-	Hydrocinnamic acid	Phenolic acids	Phenolic acids	501-52-0	B	44763	107990	32163	15842	29176	21854	5474	3624.4	5659	19027	25085	29337	18241	19903	17394	18763	C05629	ko00360,ko01100
mws0009	179.06	5.14	178.055	C10H10O3	[M+H]+	Coniferaldehyde	Phenolic acids	Phenolic acids	20649-42-7	A	8145.3	10579	8508.3	13730	8367.6	10703	65099	76368	95777	11322	11818	12561	66403	52039	63755	59330	C02666	ko00940,ko01100,ko01110
mws0014	193.06	4.53	194.049	C10H10O4	[M-H]-	Ferulic acid	Phenolic acids	Phenolic acids	1135-24-6	B	257940	160230	193820	254340	192390	273740	769310	1147800	915870	242920	304050	271750	467070	467780	458230	489980	C01494	ko00940,ko01100,ko01110
mws0018	203	1.1	202.197	C10H26N4	[M+H]+	Spermine	Alkaloids	Phenolamine	71-44-3	B	16873000	13724000	12817000	15581000	16525000	17599000	19693000	19267000	20796000	18816000	17664000	15504000	23894000	20680000	20129000	16297000	C00750	ko00330,ko00410,ko00480,ko01100
mws0024	169.02	2.25	170.015	C7H6O5	[M-H]-	Gallic acid	Flavonoids	Flavanols	149-91-7	B	24559	18395	17259	41442	22102	23371	36978	66273	57643	33478	40060	23250	38222	33592	40340	36634	C01424	--
mws0028	167	3.79	168.035	C8H8O4	[M-H]-	Vanillic acid	Phenolic acids	Phenolic acids	121-34-6	B	4289.3	4986.3	5257.3	7389.6	5446.7	6547.2	41624	56026	46296	4891.3	5592.5	10198	25430	19439	27894	25701	C06672	--
mws0034	457.2	3.78	458.068	C22H18O11	[M-H]-	Epigallocatechin gallate	Flavonoids	Flavanols	989-51-5	A	7930.7	21074	7009.5	7177.6	8043	7538.7	3348.8	4570.8	4977.8	22939	11779	14823	7308.1	6222	7405	5769.5	C09731	--
mws0042	305	3.03	306.061	C15H14O7	[M-H]-	(-)-Epigallocatechin	Flavonoids	Flavanols	970-74-1	B	1207800	1333500	1197000	1061200	1510500	1094100	24869	10186	59363	1028500	1419600	426690	579190	597750	591790	554660	C12136	ko00941,ko01110
mws0045	449.1	4.78	448.082	C21H20O11	[M+H]+	Quercitrin	Flavonoids	Flavonols	522-12-3	A	10249000	10034000	6700400	1166000	1276300	1305000	26061	10911	193870	1666700	1481400	2038300	2476800	2380200	3177100	2362500	--	--
mws0054	289.08	3.49	290.067	C15H14O6	[M-H]-	Catechin	Flavonoids	Flavanols	154-23-4	A	6064900	11263000	6329100	8044400	7922000	9568100	272780	224140	1690700	3405600	7983400	2236000	4021700	4359700	4269000	4157500	C06562	ko00941,ko01110
mws0057	451	4.16	450.096	C21H22O11	[M+H]+	Eriodictyol 7-O-glucoside	Flavonoids	Dihydroflavone	38965-51-4	B	76890	75795	57371	26843	56094	48678	19387	10217	6738	47292	73164	44532	41748	36540	32422	23861	--	--
mws0059	609.1	4.23	610.126	C27H30O16	[M-H]-	Rutin	Flavonoids	Flavonols	153-18-4	A	858130	1011600	552060	426510	358480	409610	3947.2	5513.1	8874.6	381680	602350	562800	583530	535690	576800	437580	--	--
mws0061	463.1	4.15	464.076	C21H20O12	[M-H]-	Hyperin	Flavonoids	Flavonols	482-36-0	B	9887300	8433900	11267000	2515900	2512300	1997300	4736.1	3148.8	33860	3806300	3667200	3571800	2719500	2713700	2622500	2307800	--	--
mws0066	315.06	6.31	316.047	C16H12O7	[M-H]-	Isorhamnetin	Flavonoids	Flavonols	480-19-3	A	270750	246060	273340	94384	47624	29363	9	9	9	133150	39501	55005	53911	54634	54518	55486	C10084	--
mws0089	447.09	4.65	448.082	C21H20O11	[M-H]-	Kaempferol 7-O-glucosdie	Flavonoids	Flavonols	16290-07-6	B	1752000	1890000	1512000	138710	171090	137420	9	9	9	387210	330510	354660	324270	352880	324150	323520	--	--
mws0091	463.09	4.48	464.076	C21H20O12	[M-H]-	Isoquercitrin	Flavonoids	Flavonols	482-35-9	A	9004100	7942500	8526700	2027000	2047400	1648400	3048.1	3205.5	21720	2941700	2698900	3143500	2000100	2042200	2146600	2199900	--	--
mws0103	146.1	4.99	145.047	C9H7NO	[M+H]+	Indole-3-carboxaldehyde	Alkaloids	Plumerane	487-89-8	B	22435	26375	22588	37325	28301	24959	63752	43139	44703	41248	35950	24711	50804	53784	48713	42401	C08493	--
mws0117	181.06	3.62	182.049	C9H10O4	[M-H]-	Homovanillic acid	Phenolic acids	Phenolic acids	306-08-1	B	95026	59303	112280	139610	90886	127530	3359.9	38874	29232	139960	147500	110060	32714	30714	41093	35515	C05582	ko00350,ko01100
mws0119	227.2	9.85	228.19	C14H28O2	[M-H]-	Myristic Acid	Lipids	Free fatty acids	544-63-8	A	12218000	13218000	11802000	8113100	10566000	10072000	8941000	8318000	9336300	10577000	15265000	11729000	11416000	11688000	11247000	10662000	--	--
mws0124	247.1	4.53	246.089	C13H14N2O3	[M+H]+	N-(3-Indolylacetyl)-L-alanine	Amino acids and derivatives	Amino acids and derivatives	57105-39-2	B	21128	16227	13452	16343	27424	23984	15440	40662	21241	21848	31778	17370	21282	18509	16652	20268	--	--
mws0126	524.37	9.02	523.325	C26H54NO7P	[M+H]+	1-Stearoyl-sn-glycero-3-phosphocholine	Lipids	LPC	19420-57-6	B	105780	75680	48730	45889	89288	46226	1441400	723490	1012800	90595	144850	125350	428820	421010	426440	399180	--	--
mws0133	123.1	1.99	122.043	C6H6N2O	[M+H]+	Nicotinamide	Others	Vitamin	98-92-0	A	867850	867850	847240	777740	572960	708520	2378800	3036200	2674900	822580	802950	650990	1697500	1698400	1506600	1461100	C00153	ko00760,ko01100
mws0146	138.05	4.19	137.042	C7H7NO2	[M+H]+	Nicotinic Acid Methyl Ester(Methyl Nicotinate)	Alkaloids	Alkaloids	93-60-7	B	48086	39296	39865	12248	15071	13382	18522	27272	23344	21794	25025	23941	34503	27665	30426	24027	--	--
mws0147	117.1	2.59	118.055	C5H10O3	[M-H]-	3-Hydroxy-3-methyl butyric acid	Organic acids	Organic acids	625-08-1	B	14297	10299	15516	15430	9336.9	13288	71111	81512	86100	11695	10319	10174	28675	30503	31976	28396	--	--
mws0154	173.05	1.44	174.044	C7H10O5	[M-H]-	Shikimic acid	Organic acids	Organic acids	138-59-0	B	16301000	17702000	18075000	25172000	28016000	24460000	3064500	3002000	4259000	24818000	24848000	22401000	14500000	15479000	13846000	14781000	C00493	ko00400,ko01100,ko01110,ko01230
mws0159	163.05	3.86	164.041	C9H8O3	[M-H]-	Phenylpyruvic acid	Organic acids	Organic acids	156-06-9	B	72901	52036	46630	45183	41067	33870	4524.6	8112.7	7535.1	84397	52540	106950	32147	34989	34146	26434	--	--
mws0169	595	3.1	630.107	C27H31ClO15	[M-Cl]+	Cyanidin 3-rutinoside(Keracyanin chloride)	Flavonoids	Anthocyanins	18719-76-1	B	23777000	31362000	9341500	2792000	3838400	10649000	10993	5390.6	6068	4963000	20313000	3261700	10446000	11476000	9503100	10761000	--	--
mws0175	493.14	3.24	493.112	C23H25O12	[M]+	Oenin chloride	Flavonoids	Anthocyanins	7228-78-6	B	875.15	811.76	1591.7	1144.4	628.84	788.7	10046	14554	14375	1199.6	1237.5	931.47	6947.8	6205.2	7801.8	7689	--	--
mws0177	111.02	2.67	112.012	C5H4O3	[M-H]-	2-Furanoic acid	Organic acids	Organic acids	88-14-2	B	9	9	9	32658	14141	19296	48665	94353	72252	19490	20134	16303	27338	32313	24221	28578	--	--
mws0178	353.1	3.24	354.079	C16H18O9	[M-H]-	Chlorogenic acid	Phenolic acids	Phenolic acids	327-97-9	A	17407000	17180000	18032000	13136000	14469000	17481000	3079600	2685600	6541900	15361000	17463000	18224000	13950000	12543000	12483000	12669000	C00852	ko00940,ko00941,ko00945,ko01110
mws0179	367	4.17	368.093	C17H20O9	[M-H]-	Chlorogenic acid methyl ester	Phenolic acids	Phenolic acids	29708-87-0	B	4624100	3697100	4565600	2436700	2491900	3149000	395560	291770	1076900	2752100	4126400	4264100	1984300	2028500	2082600	1955400	--	--
mws0180	153	3.07	154.021	C7H6O4	[M-H]-	2,5-Dihydroxybenzoic acid	Phenolic acids	Phenolic acids	490-79-9	B	276930	238120	275500	1223600	692460	910040	309770	450010	469830	797070	853180	572320	555210	549900	554650	556990	C00628	ko00350,ko01100
mws0183	153.1	3.05	154.021	C7H6O4	[M-H]-	Protocatechuic acid	Flavonoids	Flavanols	99-50-3	B	1764400	1561300	1891800	5424200	3339100	3803500	1176900	1646700	1773200	3679400	3945000	2324000	2409600	2500000	2416200	2323700	C00230	ko00400,ko01100,ko01110
mws0192	117.03	1.81	118.021	C4H6O4	[M-H]-	Succinic acid	Organic acids	Organic acids	110-15-6	B	30221000	11340000	20981000	40595000	66981000	34716000	133530000	163780000	105230000	30793000	32364000	28959000	66112000	69277000	107350000	72739000	C00042	ko00020,ko00190,ko00250,ko00310,ko00350,ko00360,ko00620,ko00630,ko00640,ko00650,ko00760,ko00920,ko01100,ko01110,ko01200
mws0193	190.1	1.33	189.099	C7H15N3O3	[M+H]+	L-Homocitrulline	Amino acids and derivatives	Amino acids and derivatives	1190-49-4	B	160680	121580	140700	98234	98323	91254	41611	47219	46361	162170	131930	146580	106880	76895	88000	89856	C02427	--
mws0198	179	1.26	180.053	C6H12O6	[M-H]-	D-(+)-Glucose	Others	Saccharides and Alcohols	50-99-7	A	895450	689410	752710	645560	504870	705350	2079900	2037400	1150000	357940	470410	483010	970680	1030500	995090	1208000	C00031	ko00010,ko00030,ko00052,ko00500,ko00520,ko00901,ko01100,ko01110,ko02010,ko04933
mws0208	145.06	3.13	146.049	C6H10O4	[M-H]-	Adipic Acid	Organic acids	Organic acids	124-04-9	B	30301	21590	16607	106850	64969	96583	749570	857130	657920	39570	46274	31432	250710	271290	241820	247790	C06104	ko01100
mws0214	181	1.24	182.067	C6H14O6	[M-H]-	D-Sorbitol	Others	Saccharides and Alcohols	50-70-4	B	34796	36177	34332	40739	37102	42923	103540	98454	83416	29381	34796	33599	62651	62629	64239	64201	C00794	ko00051,ko00052,ko01100,ko02010
mws0216	132.06	1.26	131.05	C5H9NO3	[M+H]+	Trans-4-Hydroxy-L-proline	Amino acids and derivatives	Amino acids and derivatives	51-35-4	B	548690	515000	454880	1964200	904670	1671200	4980100	5002900	6781400	860320	1187200	1323300	2787700	3421100	2709800	2745000	C01157	ko00330,ko01100,ko02010
mws0219	132	1.21	133.03	C4H7NO4	[M-H]-	L-AsparticAcid	Amino acids and derivatives	Amino acids and derivatives	56-84-8	B	245030	339180	303400	113420	105030	162200	647060	638420	649150	158560	170780	156740	374440	392380	373400	381040	C00049	ko00220,ko00250,ko00260,ko00261,ko00270,ko00300,ko00340,ko00410,ko00460,ko00710,ko00760,ko00770,ko00970,ko01100,ko01110,ko01200,ko01210,ko01230,ko02010
mws0227	132.1	1.7	131.085	C6H13NO2	[M+H]+	L-Leucine	Amino acids and derivatives	Amino acids and derivatives	61-90-5	A	13024000	14233000	8879100	16691000	10778000	18389000	36592000	37178000	43892000	14333000	15673000	17554000	34123000	31166000	28210000	28349000	C00123	ko00280,ko00290,ko00966,ko00970,ko01100,ko01110,ko01210,ko01230,ko02010
mws0232	377	3.71	376.12	C17H20N4O6	[M+H]+	Riboflavin	Others	Vitamin	83-88-5	A	95933	102150	85698	68253	70397	87455	20683	23867	29298	111650	92081	93130	49875	55710	61007	54903	C00255	ko00740,ko01100,ko01110,ko02010
mws0237	187.1	4.93	188.093	C9H16O4	[M-H]-	Anchoic Acid	Organic acids	Organic acids	123-99-9	A	307600	280260	250110	468860	461860	437260	1636700	1421600	1991800	314640	302960	332340	926520	970920	939130	988010	C08261	--
mws0242	173.1	4.32	174.078	C8H14O4	[M-H]-	SubericAcid	Organic acids	Organic acids	505-48-6	B	8042.7	10746	7365.9	17559	7484.6	13891	24238	23985	26932	15132	16780	13583	10563	18012	12213	17174	C08278	--
mws0248	243.1	1.69	244.058	C9H12N2O6	[M-H]-	Uridine	Nucleotides and derivatives	Nucleotides and derivatives	58-96-8	B	58657	64064	30482	26848	25218	34388	96412	106350	130200	38775	47267	28569	77109	81677	87906	69982	C00299	ko00240,ko01100,ko02010
mws0250	182.1	1.63	181.065	C9H11NO3	[M+H]+	L-(-)-Tyrosine	Amino acids and derivatives	Amino acids and derivatives	60-18-4	A	2511700	3388700	2227300	2858200	2109600	2947600	5831200	5682900	8651500	3199300	3535400	3466900	7265300	5900400	4950600	5491500	C00082	ko00130,ko00261,ko00350,ko00360,ko00400,ko00460,ko00730,ko00940,ko00950,ko00965,ko00966,ko00970,ko01100,ko01110,ko01210,ko01230
mws0251	127	2.06	126.037	C5H6N2O2	[M+H]+	Thymine	Nucleotides and derivatives	Nucleotides and derivatives	65-71-4	B	23718	15440	19742	42458	21402	35182	61682	117070	101360	27088	43826	23695	46328	47842	43672	42719	C00178	ko00240,ko01100
mws0254	156.1	1.18	155.061	C6H9N3O2	[M+H]+	L-Histidine	Amino acids and derivatives	Amino acids and derivatives	71-00-1	B	246550	157580	176780	495520	374660	434880	509140	761050	1095100	318540	422970	399330	596940	506020	522030	482490	C00135	ko00340,ko00410,ko00970,ko01100,ko01110,ko01230,ko02010
mws0256	118.1	1.34	117.07	C5H11NO2	[M+H]+	L-Valine	Amino acids and derivatives	Amino acids and derivatives	72-18-4	B	1113400	999630	931720	4326500	1997500	3143500	10037000	7586300	12979000	2040700	2452100	3075200	5523300	5908800	5204900	5138100	C00183	ko00280,ko00290,ko00460,ko00770,ko00966,ko00970,ko01100,ko01110,ko01210,ko01230,ko02010
mws0258	132	1.73	131.085	C6H13NO2	[M+H]+	L-Isoleucine	Amino acids and derivatives	Amino acids and derivatives	73-32-5	A	4245600	5144900	3759300	6605800	4197600	6623600	15687000	14769000	16139000	6332400	5662800	5727500	13416000	11168000	10733000	11986000	C00407	ko00280,ko00290,ko00460,ko00960,ko00966,ko00970,ko01100,ko01110,ko01210,ko01230,ko02010
mws0260	175	1.23	174.1	C6H14N4O2	[M+H]+	L-(+)-Arginine	Amino acids and derivatives	Amino acids and derivatives	74-79-3	B	72117	52231	70925	61567	55156	83016	101830	107410	187210	47983	59962	41924	122370	126430	120660	94232	C00062	ko00220,ko00261,ko00330,ko00472,ko00970,ko00998,ko01100,ko01110,ko01230,ko02010
mws0264	341	1.22	342.096	C12H22O11	[M-H]-	D-(+)-TrehaloseAnhydrous	Others	Saccharides and Alcohols	99-20-7	A	2291600	2363300	2226300	1524000	1310000	1377000	1198200	1064400	1336700	1699700	1031300	1797900	1430500	1458800	1431900	1438100	--	--
mws0274	165	4.37	166.055	C9H10O3	[M-H]-	Phenyllactate(PLA)	Organic acids	Organic acids	828-01-3	A	11236	16829	16063	27977	25781	30628	5467.6	6438.1	12059	28410	27039	29969	13434	18882	18804	17376	--	--
mws0275	133	1.47	134.015	C4H6O5	[M-H]-	L-(-)-Malic acid	Organic acids	Organic acids	636-61-3	A	3272500	2263500	2049200	2551300	4303600	2367900	8402800	8639900	7463800	2971200	2649500	3530000	4903000	5294900	4757700	4474500	C00497	ko00650,ko01100
mws0277	191	1.63	192.053	C7H12O6	[M-H]-	Kinic acid	Organic acids	Organic acids	77-95-2	B	10175000	10191000	12710000	14226000	16233000	11734000	959070	703110	968990	16982000	12788000	14121000	6411100	8440200	7912100	7497700	C00296	ko00400,ko01100
mws0281	191	1.34	192.018	C6H8O7	[M-H]-	Citric Acid	Organic acids	Organic acids	77-92-9	B	7751600	8563500	7892200	6508900	7816500	7461000	467040	596260	544550	7356400	7433600	7217100	3543700	4056400	3417000	3462300	C00158	ko00020,ko00250,ko00630,ko01100,ko01110,ko01200,ko01210,ko01230
mws0282	203	2.97	204.08	C11H12N2O2	[M-H]-	L-Tryptophan	Amino acids and derivatives	Amino acids and derivatives	73-22-3	A	3689800	2549400	3260400	4660800	4296600	3930000	4715800	6080400	7089100	3338200	3240500	2641200	4015300	4422300	3983100	4050600	C00078	ko00260,ko00380,ko00400,ko00901,ko00966,ko00970,ko01100,ko01110,ko01210,ko01230
mws0289	478.1	7.99	479.268	C23H46NO7P	[M-H]-	LysoPE 18:1	Lipids	LPE	89576-29-4	A	28763	36071	62302	20019	53315	58682	1552000	880400	905960	13185	15829	17213	1118700	1265000	1305200	1335600	--	--
mws0328	181	2.98	182.049	C9H10O4	[M-H]-	DL-P-hydroxyphenyllactic acid	Organic acids	Organic acids	6482-9-80	A	2235000	3501700	1923700	2257900	1682700	2119500	422640	509180	558530	1538700	1816600	977890	1448300	1453600	1508700	1449100	--	--
mws0340	143	2.85	144.035	C6H8O4	[M-H]-	2,3-Dimethylsuccinic acid	Amino acids and derivatives	Amino acids and derivatives	13545-04-5	B	6392.4	4455.6	5954.4	7976.6	8283.2	7400.6	30066	30198	22153	9671.6	9986.6	8313.2	17135	17965	18160	19549	--	--
mws0341	131.08	4.01	132.07	C6H12O3	[M-H]-	(S)-(-)-2-Hydroxyisocaproic acid	Organic acids	Organic acids	13748-90-8	B	39253	38150	40581	81341	51051	52310	25755	26833	35532	33071	40842	67598	79278	75899	86361	79291	--	--
mws0344	165.05	1.45	166.038	C5H10O6	[M-H]-	D-Xylonic acid	Organic acids	Organic acids	526-91-0	A	489000	429520	475420	228760	315530	272240	447620	524230	556490	217930	257120	332650	314430	343190	293810	327400	--	--
mws0351	457.08	3.8	458.068	C22H18O11	[M-H]-	Gallate catechin gallate	Flavonoids	Flavanols	4233-96-9	A	8215.3	32743	11423	7559.7	9802	10533	4406.8	5052.3	5559	24156	14824	15967	10960	13029	7895.8	5603.5	--	--
mws0355	441.3	4.25	442.073	C22H18O10	[M-H]-	(-)-Catechin gallate	Flavonoids	Flavanols	130405-40-2	B	3659.4	8999.8	2695	4456.4	18977	5383.7	2474.3	3159.2	3749.1	11043	16524	11271	7308.1	6171.4	5641.3	4359.2	C09731	--
mws0366	277.22	9.78	278.205	C18H30O2	[M-H]-	γ-Linolenic Acid	Lipids	Free fatty acids	506-26-3	A	4948400	4129800	4097700	2917600	5281900	3444300	4230200	4085700	4285300	2676000	4024600	4769500	4070900	4349800	4293300	4295100	--	--
mws0367	277.1	9.56	278.205	C18H30O2	[M-H]-	α-Linolenic Acid	Lipids	Free fatty acids	463-40-1	A	12171	9367.1	9823.5	6965.3	12948	8415.1	9547.7	9061.8	10600	6868.3	10082	10755	10555	9905.8	10293	9544.9	C06427	ko00592,ko01040,ko01100,ko01110
mws0376	115	1.61	116.006	C4H4O4	[M-H]-	Fumaric acid	Organic acids	Organic acids	110-17-8	B	117580	74067	110410	604340	272540	287700	1828600	710590	1593700	250660	274210	307500	621390	695200	633840	619350	C00122	ko00020,ko00190,ko00220,ko00250,ko00350,ko00360,ko00620,ko00650,ko00760,ko01100,ko01110,ko01200
mws0383	267.23	10.47	268.219	C17H32O2	[M-H]-	Cis-10-Heptadecenoic Acid	Lipids	Free fatty acids	29743-97-3	A	150400	77153	113320	69956	90428	79555	557840	562950	521780	71572	110460	133820	323960	379410	305590	295110	--	--
mws0396	281.25	11.11	282.234	C18H34O2	[M-H]-	Elaidic Acid	Lipids	Free fatty acids	112-79-8	A	64042	49210	53074	42382	60776	53480	62351	57120	59897	55222	55950	55851	62616	64252	61585	62426	--	--
mws0425	129	2.15	130.021	C5H6O4	[M-H]-	Citraconic acid	Organic acids	Organic acids	498-23-7	A	474330	285730	451240	518870	425760	390810	1158800	1661300	1183600	396660	523890	422850	762600	718870	745370	692630	C02226	ko00290,ko00660,ko01100,ko01210
mws0437	151.15	1.23	152.058	C5H12O5	[M-H]-	D-Arabitol	Others	Saccharides and Alcohols	488-82-4	B	60379	54256	58963	70110	64236	63468	67777	50876	81570	54540	60591	44029	57470	56673	59758	63531	C01904	ko00040,ko01100
mws0438	151.15	1.26	152.058	C5H12O5	[M-H]-	L-Arabitol	Others	Saccharides and Alcohols	7643-75-6	B	53950	43295	53361	60087	51679	57170	79270	60034	87884	47523	60249	43615	53826	59108	59678	62636	--	--
mws0467	165.06	4.34	166.055	C9H10O3	[M-H]-	3-(4-Hydroxyphenyl)-propionic acid	Phenolic acids	Phenolic acids	501-97-3	B	71062	71886	72690	65125	42778	87854	19999	25597	30608	60272	92361	68890	47637	44441	45582	43746	C01744	--
mws0470	117.02	1.82	118.021	C4H6O4	[M-H]-	Methylmalonic acid	Organic acids	Organic acids	516-05-2	B	680420	776080	986840	1564100	1900200	1357100	14118000	12109000	10679000	831080	1039300	1382100	3604000	3554400	4148200	4050600	C02170	ko00240,ko00280,ko00640,ko01100
mws0473	131.04	2.58	132.035	C5H8O4	[M-H]-	2-Methylsuccinic acid	Organic acids	Organic acids	498-21-5	A	6191.6	6097.6	6542.2	30184	23786	28075	300690	383860	245150	13255	16793	11299	66780	69860	68541	64493	--	--
mws0491	122.1	2.89	121.082	C8H11N	[M+H]+	Phenethylamine	Others	Others	64-04-0	B	17822	21330	17677	21456	16709	23184	50261	74419	69781	17717	20889	24386	46719	49820	49087	40390	C05332	ko00360,ko01100
mws0497	165.06	4.37	166.055	C9H10O3	[M-H]-	L-(-)-3-Phenyllactic acid	Organic acids	Organic acids	20312-36-1	A	29309	26542	30984	41716	44817	53490	14020	7542.9	15762	47091	37188	65819	31865	26254	23965	32966	--	--
mws0520	224.1	3.13	223.074	C11H13NO4	[M+H]+	N-Acetyl-L-tyrosine	Amino acids and derivatives	Amino acids and derivatives	537-55-3	B	21151	21159	16625	13497	9155.1	11287	14287	16287	16365	12411	11701	9237	16798	15754	12080	13874	--	--
mws0566	123.05	4.52	124.046	C7H8O2	[M-H]-	4-Methylcatechol	Flavonoids	Flavanols	452-86-8	B	17178	10371	18406	17740	15316	13139	9	7424.4	5833	15283	17705	24603	6332.8	10397	10295	10521	C06730	ko01100
mws0567	146.09	1.27	145.076	C5H11N3O2	[M+H]+	4-Guanidinobutyric acid	Organic acids	Organic acids	463-00-3	B	17889	28158	35702	96717	69046	51786	642730	395360	399240	60097	63606	63640	276640	267890	227270	239190	C01035	ko00330,ko01100
mws0572	126.1	1.63	125.052	C5H7N3O	[M+H]+	5-Methylcytosine	Nucleotides and derivatives	Nucleotides and derivatives	554-01-8	B	102370	72699	69299	98548	61069	73427	87935	124640	116650	86025	94959	79187	97007	103680	101410	82153	C02376	ko00240,ko01100
mws0582	322.4	1.73	321.082	C11H19N3O6S	[M+H]+	S-(methyl)glutathione	Amino acids and derivatives	Amino acids and derivatives	2922-56-7	B	7464.9	8652.9	6534.4	6591.5	7798.9	6948.7	3798.2	2408.4	2188	8624.4	12016	4350.7	15459	10867	11855	10991	C11347	--
mws0609	344.2	1.87	345.033	C10H12N5O7P	[M-H]-	Guanosine 3',5'-cyclic monophosphate	Nucleotides and derivatives	Nucleotides and derivatives	7665-99-8	B	29012	21795	20584	30405	15565	21098	161350	204300	256890	23089	32425	19748	109310	105220	103350	92724	C00942	ko00230,ko01100
mws0628	121.04	4.19	122.032	C7H6O2	[M-H]-	4-Hydroxybenzaldehyde	Phenolic acids	Phenolic acids	123-08-0	A	62047	79117	68059	241390	182250	240790	362580	427010	397190	209520	220700	183160	255950	263310	266350	252500	C00633	ko01100
mws0629	281.3	2.99	280.092	C13H16N2O5	[M+H]+	Asp-phe	Amino acids and derivatives	Amino acids and derivatives	13433-09-5	B	20716	21057	13799	16250	14406	11736	127390	133840	97639	17435	17965	17251	68688	66337	75490	67249	--	--
mws0639	153.2	3.14	154.021	C7H6O4	[M-H]-	2,3-Dihydroxybenzoic Acid	Organic acids	Organic acids	303-38-8	B	1017700	976630	997620	3528200	2189100	2643000	796030	1083300	1118400	2398100	2675900	1722800	1527900	1636800	1638300	1607300	C00196	ko01110
mws0677	219	3.73	218.095	C12H14N2O2	[M+H]+	N-Acetyl-5-hydroxytryptamine	Alkaloids	Alkaloids	1210-83-9	B	4041	2579.1	6656.4	142900	115150	120360	44051	69924	93429	120960	111120	108000	108820	110490	109280	103380	C00978	ko00380,ko01100
mws0736	189.1	2.42	188.103	C8H16N2O3	[M+H]+	N-Glycyl-L-leucine	Amino acids and derivatives	Amino acids and derivatives	869-19-2	B	69834	78452	70735	61240	57922	78587	56666	84563	83706	58993	71036	72207	103190	86286	85496	80143	C02155	--
mws0748	353.1	2.71	354.079	C16H18O9	[M-H]-	1-Caffeoylquinic acid	Phenolic acids	Phenolic acids	1241-87-8	B	3874700	1943900	3580100	1009900	1245500	1253200	220640	200160	442750	1747200	2749800	3383400	1975800	2064200	2034400	1886700	--	--
mws0749	137.03	3.55	138.026	C7H6O3	[M-H]-	4-Hydroxybenzoic acid	Phenolic acids	Phenolic acids	99-96-7	A	332790	209220	373630	829360	513880	699740	559780	790200	803960	576840	935190	555410	554660	540980	534050	461860	C00156	ko00130,ko00790,ko01100,ko01110
mws0789	255.1	6.03	256.064	C15H12O4	[M-H]-	Pinocembrin(Dihydrochrysin)	Flavonoids	Dihydroflavone	480-39-7	A	188860	195160	285280	38362	146750	62470	15588	14462	18262	73733	69249	59330	51814	52226	56896	58050	C09827	ko00941
mws0836	577.3	3.16	578.12	C30H26O12	[M-H]-	Procyanidin B1	Tannins	Proanthocyanidins	20315-25-7	A	1224500	2093200	1278100	2322700	1937600	2225400	20517	23038	277140	1603900	1322300	2024800	1234800	1283300	1101000	1191700	--	--
mws0853	209	4.33	210.078	C11H14O4	[M-H]-	Sinapyl alcohol	Phenolic acids	Phenolic acids	537-33-7	B	70435	85324	35980	34434	48166	34268	16665	68044	47263	66447	46948	54700	32762	34989	34203	29619	C02325	ko00940,ko01100,ko01110
mws0856	463	4.3	464.076	C21H20O12	[M-H]-	Spiraeoside	Flavonoids	Flavonols	20229-56-5	A	6103900	4953400	6690600	1236400	1440400	1080900	7821	14261	21863	2071200	1728700	2220200	1744800	1539800	1472500	1609400	--	--
mws0863	213	1.73	234.988	C5H9NaO7P	[M-Na]-	2-Deoxyribose 5-phosphate	Nucleotides and derivatives	Nucleotides and derivatives	102916-66-5	B	3739.9	3008.3	2393.7	12611	3560.9	7057.8	89662	54796	94801	3081.8	5877.7	3771.4	20008	22015	25640	21204	--	--
mws0866	259	1.19	260.016	C6H13O9P	[M-H]-	D-Glucose 6-phosphate	Others	Saccharides and Alcohols	56-73-5	A	817440	1016400	985180	739790	805710	805580	1115600	1021800	830050	673870	692160	497210	814660	838010	798050	791620	C00092	ko00500,ko00562,ko00998,ko01100
mws0911	269	4.82	270.044	C15H10O5	[M-H]-	Demethyltexasin	Flavonoids	Isoflavones	17817-31-1	B	4760.7	3505.3	3622.5	6376	3861.6	4553.9	5020.3	6217.7	7199.8	5074.7	3729.7	2658.9	5689.7	5947.8	5009.3	6772.6	C14314	ko00943,ko01110
mws0917	329	6.82	330.061	C17H14O7	[M-H]-	3,7-Di-O-methylquercetin	Flavonoids	Flavonols	2068-02-2	B	101670	75763	147930	28961	33696	11138	9	9	9	32450	12650	23189	33880	35548	39681	39982	C01265	ko00944
mws0919	431	4.95	432.088	C21H20O10	[M-H]-	Kaempferin	Flavonoids	Flavonols	482-39-3	B	742770	945750	652460	73562	99201	73325	3499.8	2667.9	5256.3	178170	152660	257900	156240	164950	150410	154770	C16911	ko00944
mws0921	149	4	150.061	C9H10O2	[M-H]-	p-Coumaryl alcohol	Phenolic acids	Phenolic acids	3690-05-9	A	6980100	6383800	5678000	8486600	7640500	7266400	287070	426730	698130	8464800	12323000	6104500	4367300	4838400	4478500	4306800	C02646	ko00940,ko01100,ko01110
mws0924	145.06	3.13	146.049	C6H10O4	[M-H]-	2-Methylglutaric acid	Organic acids	Organic acids	617-62-9	B	37099	31371	30676	99978	80162	95032	853950	939390	727560	51446	69277	35495	219040	246160	222840	197510	--	--
mws0972	131.08	3.13	132.07	C6H12O3	[M-H]-	5-Hydroxyhexanoic acid	Organic acids	Organic acids	185956-02-9	A	19349	15684	8050.4	21521	14462	19253	37102	41005	32458	23869	33811	9498.4	21979	25588	25406	22565	--	--
mws0983	326.31	9.8	325.272	C20H39NO2	[M+H]+	N-Oleoylethanolamine	Others	Others	111-58-0	B	11783	8444.7	7260.1	6364	11075	7363.7	58771	47643	66531	6307.4	10119	9697.4	42277	38614	37238	34262	--	--
mws0987	161	6.24	160.046	C10H8O2	[M+H]+	6-MethylCoumarin	Lignans and Coumarins	Coumarins	92-48-8	A	74169	40925	67174	29921	59465	35580	37911	315390	190430	38488	37649	45508	89485	72235	80526	59300	--	--
mws0988	315	6.69	316.047	C16H12O7	[M-H]-	Rhamnetin(7-O-Methxyl Quercetin)	Flavonoids	Flavonols	90-19-7	B	872220	592110	1110000	171410	106120	78447	9	9	9	293530	99239	270030	265960	268080	256310	240190	C10176	--
mws0997	479	2.92	478.091	C22H22O12	[M+H]+	Petunidin 3-O-glucoside	Flavonoids	Anthocyanins	6988-81-4	B	3661.3	4904.8	4368.1	5161.9	3379.2	5553.1	25339	19130	11689	3384.7	2935	2818.5	15228	13148	11192	11952	--	--
mws1014	209.2	4.07	208.029	C10H8O5	[M+H]+	Fraxetin	Lignans and Coumarins	Coumarins	574-84-5	A	204030	148100	219150	155410	190230	236350	276830	497130	459560	170110	172820	213360	324190	316970	269350	271800	C09265	--
mws1015	339.1	3.21	340.065	C15H16O9	[M-H]-	Esculin(6,7-DihydroxyCoumarin-6-glucoside)	Lignans and Coumarins	Coumarins	531-75-9	A	103610	92153	112220	135300	99257	126360	496140	717500	336310	48211	111830	43915	196310	213430	210540	260650	C09264	--
mws1024	147.1	4.75	148.046	C9H8O2	[M-H]-	p-Coumaraldehyde	Phenolic acids	Phenolic acids	2538-87-6	B	17194	20526	13013	22453	13518	20434	8476.2	11285	12891	41410	37839	20344	16092	18075	12058	12425	--	--
mws1038	277.13	3.25	278.112	C11H22N2O4S	[M-H]-	(R)-Pantetheine	Others	Others	496-65-1	A	101520	95579	78747	90096	63447	86284	534680	673380	472040	75960	66608	50283	270320	250990	272090	233350	C00831	ko00332,ko00770
mws1048	449.1	3.18	448.082	C21H20O11	[M+H]+	Cyanidin 3-O-galactoside	Flavonoids	Anthocyanins	27661-36-5	A	1058300	1566000	483920	333110	248670	830040	32412	19762	26799	275050	834440	218980	482060	495470	446410	489690	C08647	--
mws1060	267.08	1.93	268.068	C10H12N4O5	[M-H]-	9-(β-D-Arabinofuranosyl)hypoxanthine	Nucleotides and derivatives	Nucleotides and derivatives	7013-16-3	B	97442	117820	87562	79440	81828	98225	39985	28418	51651	45908	59755	72901	62061	62655	68975	58835	--	--
mws1068	285.05	6.18	286.038	C15H10O6	[M-H]-	Kaempferol	Flavonoids	Flavonols	520-18-3	A	147620	69380	107550	24982	16433	9114.6	9	9	9	35703	28173	38774	28305	25455	23669	25308	C05903	ko00941,ko00944,ko01100,ko01110
mws1074	177.03	3.85	178.021	C9H6O4	[M-H]-	Daphnetin	Lignans and Coumarins	Coumarins	486-35-1	A	16027	9652.7	18161	276370	184230	289260	420860	536420	416310	41121	339260	83047	231120	260340	239910	227240	C03093	--
mws1077	355.1	3.51	354.079	C16H18O9	[M+H]+	Scopolin	Lignans and Coumarins	Coumarins	531-44-2	B	5344800	3153500	4195100	3826200	3728200	3837100	1381000	1575600	1231300	4301100	4153100	5202100	3276000	3292200	3442900	3217900	C01527	ko00940,ko01110
mws1078	138.05	4.51	137.042	C7H7NO2	[M+H]+	Anthranilic Acid	Phenolic acids	Phenolic acids	118-92-3	B	16139	21109	14147	11606	9139.9	14515	4613.3	9261	13595	16232	14092	11284	11522	7816.6	9820.9	10732	C00108	ko00380,ko00400,ko00998,ko01058,ko01100,ko01110,ko01230
mws1080	341.1	1.25	342.096	C12H22O11	[M-H]-	Galactinol	Others	Saccharides and Alcohols	3687-64-7	A	23245000	24810000	22006000	16804000	13404000	14417000	11497000	11182000	13840000	14769000	14700000	18320000	15986000	15900000	15319000	14308000	--	--
mws1090	259	1.28	260.016	C6H13O9P	[M-H]-	Glucose-1-phosphate	Others	Saccharides and Alcohols	59-56-3	A	771910	885340	936760	686460	849850	848540	1086800	1036600	828430	654900	605730	471120	752550	817210	789130	728450	--	--
mws1155	181.2	1.28	182.067	C6H14O6	[M-H]-	Mannitol	Others	Saccharides and Alcohols	87-78-5	B	8940.8	8579.4	8881.8	10674	10469	10082	28600	26481	37098	9086	8879	6912.4	21052	19122	18263	15888	C00392	ko00051,ko01100,ko02010
mws1189	193.1	1.26	194.033	C6H10O7	[M-H]-	D-Galacturonic acid(Gal A)	Organic acids	Organic acids	91510-62-2	B	43805	34631	41267	33919	37500	36915	8513.3	19736	12623	43250	35316	33346	22754	30720	27099	20500	C00333	ko00040,ko00053,ko00520,ko01100,ko02010
mws1195	179.1	5.98	178.055	C10H10O3	[M+H]+	Methyl p-coumarate	Phenolic acids	Phenolic acids	3943-97-3	B	242210	147340	214560	82482	105590	90258	31149	29985	37881	110360	138370	115090	80392	82324	86248	79366	--	--
mws1212	209.1	6.25	208.064	C11H12O4	[M+H]+	Methyl ferulate	Phenolic acids	Phenolic acids	2309-07-1	A	724690	170850	326900	71629	123370	109490	122190	203250	232820	117210	112300	144180	256770	224970	249330	214260	--	--
mws1213	193.1	1.26	194.033	C6H10O7	[M-H]-	Aldehydo-D-galacturonate	Organic acids	Organic acids	685-73-4	B	119550	227380	189480	106790	81798	104390	14533	9263.6	14048	64337	68220	136080	59780	61155	49112	55615	--	--
mws1326	301.04	5.63	302.033	C15H10O7	[M-H]-	Herbacetin	Flavonoids	Flavonols	527-95-7	A	5706.2	2729.1	4766.6	974.37	608.29	844.33	1333.4	167.74	417.99	2325.2	1199.2	1564.9	799.71	772.59	811.52	671.51	--	--
mws1329	463.09	4.5	464.076	C21H20O12	[M-H]-	Gossypitrin	Flavonoids	Flavonols	491-50-9	A	5880300	5241400	6458000	1324100	1538300	1026700	4295.9	3609.3	16513	1935000	1980100	2160900	1641300	1367000	1408600	1466300	--	--
mws1333	341.12	1.23	342.096	C12H22O11	[M-H]-	Melibiose	Others	Saccharides and Alcohols	585-99-9	A	2984100	2794300	2666100	1847200	1772600	1698600	1538900	1376100	1558700	1890200	1978500	2151700	1485800	1583700	1662900	1730800	C05402	ko00052,ko01100,ko02010
mws1336	138.05	3.24	137.042	C7H7NO2	[M+H]+	4-Aminobenzoic acid	Phenolic acids	Phenolic acids	150-13-0	B	82157	139540	88476	223430	223080	217700	45944	45015	25784	200930	285930	139800	345600	410470	399870	434360	--	--
mws1337	220.2	2.78	219.097	C9H17NO5	[M+H]+	D-Pantothenic Acid	Others	Vitamin	79-83-4	A	601700	681410	611070	706010	688950	772620	3291400	3682300	3182200	693950	804650	459250	2718500	2287800	2207100	2116200	C00864	ko00410,ko00770,ko01100,ko01110
mws1346	162.07	1.3	161.059	C6H11NO4	[M+H]+	DL-2-Aminoadipic acid	Alkaloids	Alkaloids	542-32-5	B	40815	30042	21374	44680	23742	46474	74984	74050	73767	35109	48712	48952	81880	69999	59202	49136	--	--
mws1350	181.06	4.6	182.049	C9H10O4	[M-H]-	Syringic Aldehyde	Phenolic acids	Phenolic acids	134-96-3	B	68070	62770	64970	101350	118140	126690	448030	545420	473610	118760	139570	106900	282310	291520	276630	311280	--	--
mws1354	193.06	4.59	194.049	C10H10O4	[M-H]-	Trans-ferulic acid	Phenolic acids	Phenolic acids	537-98-4	B	297340	166980	225190	324000	250430	306920	812520	1209800	976750	269620	341590	276340	480280	563870	492370	564300	--	--
mws1358	109.04	3.73	110.032	C6H6O2	[M-H]-	Pyrocatechol	Phenolic acids	Phenolic acids	120-80-9	A	98723	48733	141720	256530	179000	191870	19773	46754	57844	141290	217490	176220	85615	92798	94367	90141	C00090	ko01100
mws1361	449.1	4.47	450.096	C21H22O11	[M-H]-	Astilbin	Flavonoids	Dihydroflavonol	29838-67-3	A	10391000	12409000	14398000	23869000	23114000	25835000	13293	6928.3	199710	19305000	16109000	19196000	6717400	7757100	6922800	6579000	C17449	--
mws1417	160	4.89	161.042	C9H7NO2	[M-H]-	Indole-3-carboxylic acid	Alkaloids	Plumerane	771-50-6	B	3763.8	5359	6607.1	7513.5	4288.5	6909.3	10506	12535	12759	5722.5	6790.4	7363.5	7319.2	7726.1	7724.2	6586.1	--	--
mws1433	314.1	5.43	313.117	C18H19NO4	[M+H]+	N-Feruloyltyramine	Alkaloids	Phenolamine	66648-43-9	A	6972.7	9727.4	2463.4	2804.7	3772.8	5540.3	440550	412580	756250	6332	12084	43849	401470	378510	385830	386770	--	--
mws1482	237.19	7.42	236.162	C15H24O2	[M+H]+	Prehelminthosporol	Terpenoids	Sesquiterpenoids	1619-13-2	A	76001	93251	170810	88546	104600	95137	114930	93822	142900	70820	58259	101900	122220	112080	106830	107490	--	--
mws1489	283.26	10.05	284.248	C18H36O2	[M-H]-	Stearic Acid	Lipids	Free fatty acids	57-11-4	A	19342000	19835000	19014000	17522000	26031000	23903000	18038000	14839000	17908000	21782000	22799000	25988000	19457000	20250000	18196000	17484000	--	--
mws1499	149.05	1.33	150.044	C5H10O5	[M-H]-	D-(-)-Arabinose	Others	Saccharides and Alcohols	10323-20-3	B	52026	43261	42520	34625	38436	32384	71826	89147	71162	29662	25661	30355	54131	40611	54794	50580	--	--
mws1503	133.07	6.42	132.052	C9H8O	[M+H]+	Cinnamaldehyde	Phenolic acids	Phenolic acids	104-55-2	A	15257	15064	8642.5	11357	10085	8245.1	9	9	9	15221	16976	10330	8160.1	7230.2	6977.6	5768.5	--	--
mws1521	285.1	3.15	286.09	C13H18O7	[M-H]-	Salicin	Phenolic acids	Phenolic acids	138-52-3	B	141330	109070	98955	49209	65351	58703	146880	149330	128550	68747	83541	71176	107490	115110	122190	103050	C01451	ko00010
mws1584	515.12	3.63	516.105	C25H24O12	[M-H]-	Cynarin	Phenolic acids	Phenolic acids	30964-13-7	B	1152300	1020500	939590	1810500	2058600	2485900	211250	125340	511860	1652500	2801500	1482200	2050300	2240800	2314000	2089800	C10445	--
mws1587	132.1	1.85	131.085	C6H13NO2	[M+H]+	α-Aminocaproic acid	Amino acids and derivatives	Amino acids and derivatives	327-57-1	A	13241000	13993000	9186800	17572000	10275000	17609000	36035000	36003000	44870000	14955000	16248000	16789000	34781000	30614000	27947000	27763000	--	--
mws1589	503.2	1.3	504.14	C18H32O16	[M-H]-	Panose	Others	Saccharides and Alcohols	33401-87-5	B	16913	23022	20090	14121	16954	17932	52382	62678	55031	12280	13591	17344	29938	32822	36476	32869	C00713	--
mws1593	665.1	1.27	666.184	C24H42O21	[M-H]-	Maltotetraose	Others	Saccharides and Alcohols	34612-38-9	B	34820	33896	26419	58094	54627	44529	171090	130580	100870	45355	35753	43579	49407	61490	50933	65057	C02052	--
mws1610	471.38	8.27	472.323	C30H48O4	[M-H]-	Maslinic acid	Terpenoids	Triterpene	4373-41-5	A	13860	35312	11932	21416	18333	12106	109210	100710	50539	4978.2	38369	11454	54173	59817	50436	53539	--	--
mws1639	223.06	4.74	222.044	C11H10O5	[M+H]+	Isofraxidin	Lignans and Coumarins	Coumarins	486-21-5	A	892190	708800	935790	1381200	1457600	2126400	21825000	25818000	23087000	1221400	1897900	1926800	12371000	13275000	12223000	11524000	C17480	--
mws1709	133	1.38	134.015	C4H6O5	[M-H]-	Malic acid	Organic acids	Organic acids	636-61-3	A	676760	473350	491530	272590	497060	294830	1122800	1178500	939620	312210	337260	473500	610280	651060	670990	641420	--	--
mws1712	166.19	2.42	165.07	C9H11NO2	[M+H]+	D-(+)-Phenylalanine	Amino acids and derivatives	Amino acids and derivatives	673-06-3	A	3010000	3091500	2096200	2597300	1916300	2604400	4704000	5762200	6417400	4059800	4750000	5236600	6488600	5450500	5031500	5116700	C02265	ko00360,ko01100
mws2104	193.07	1.24	194.067	C7H14O6	[M-H]-	D-Pinitol	Others	Others	10284-63-6	B	34784	37180	35459	31770	40188	34718	2982.1	5732.8	4534.3	39515	32499	39085	18359	17524	16286	20097	--	--
mws2105	229.08	7.88	228.07	C14H12O3	[M+H]+	Benzyl salicylate	Phenolic acids	Phenolic acids	118-58-1	B	41388000	41646000	37781000	40560000	38859000	37170000	21607000	20683000	22547000	41714000	43818000	41351000	36327000	37269000	34081000	31409000	--	--
mws2108	353.1	3.42	354.079	C16H18O9	[M-H]-	Cryptochlorogenic acid	Phenolic acids	Phenolic acids	905-99-7	A	20974000	19842000	24497000	6663800	7352500	7829100	1035600	961450	1930100	13313000	15391000	17943000	10517000	12203000	10848000	11089000	--	--
mws2118	435.13	4.95	436.116	C21H24O10	[M-H]-	Phloretin 2'-O-glucoside	Flavonoids	Isoflavones	60-81-1	A	36400000	43314000	39049000	39983000	38462000	34933000	125920	48990	633920	32234000	30714000	34571000	24750000	23628000	23677000	23089000	--	--
mws2184	207.07	5.97	208.064	C11H12O4	[M-H]-	Ethyl caffeate	Organic acids	Organic acids	102-37-4	B	25510	23384	19045	43047	29602	43155	13177	10651	23159	43438	52227	31642	23755	26551	23898	24761	--	--
mws2210	463.12	3.44	498.072	C22H23ClO11	[M-Cl]+	Peonidin 3-O-glucoside chloride	Flavonoids	Anthocyanins	6906-39-4	B	1914.8	1516	1836.2	1436.9	2935	1207.8	44589	33308	32614	1369.7	1240.1	1677.5	10455	13509	10424	12210	--	--
mws2212	179.04	3.64	180.035	C9H8O4	[M-H]-	Caffeic acid	Phenolic acids	Phenolic acids	331-39-5	A	1446500	1037900	1474200	3099500	1958200	3038200	3329900	2883100	2823200	2508800	3462500	2186000	2474700	2722500	2442300	2663500	C01197	ko00940,ko01100,ko01110
mws2213	147.05	5.72	148.046	C9H8O2	[M-H]-	Cinnamic acid	Phenolic acids	Phenolic acids	140-10-3	B	113410	146900	82228	139091	148704	130666	9098	8920.1	13056	96372	108280	85713	46142	45563	45491	47497	C00423	ko00130,ko00360,ko00940,ko00999,ko01100,ko01110
mws2218	195.08	3.64	194.071	C8H10N4O2	[M+H]+	Caffeine	Alkaloids	Alkaloids	58-08-2	A	2356.6	6816.8	1342.5	5414.3	12145	3769.6	5801.2	6900.4	5538.8	4886.9	3984.8	4534.3	12730	9645	10897	8713.5	C07481	ko00232,ko01100,ko01110
mws2220	457.08	3.97	458.068	C22H18O11	[M-H]-	Gallocatechin 3-O-gallate	Flavonoids	Flavanols	5127-64-0	A	12097	26209	6172.5	10787	11460	13845	8402.1	4574.4	6004.9	38740	16179	15050	13695	9844.5	13378	9781.3	--	--
mws2221	441.08	4.44	442.073	C22H18O10	[M-H]-	Catechin gallate	Flavonoids	Flavanols	130405-40-2	B	6825.3	11514	4246.6	13534	39087	8533.1	2157.4	4969.7	5505.9	20301	35327	12280	5324.4	7084.4	5178.4	6261.5	--	--
mws2368	137.07	3.55	138.061	C8H10O2	[M-H]-	Tyrosol	Phenolic acids	Phenolic acids	501-94-0	B	66841	66333	65693	154040	86742	130270	285200	331850	318300	128820	167370	123250	152070	171620	159570	153700	--	--
mws2471	303.05	4.79	303.04	C15H11O7	[M]+	Delphinidin chloride	Flavonoids	Anthocyanins	528-53-0	A	99681	94281	57108	18817	17504	18127	2370.7	2537.2	3841.1	24147	21635	26192	26312	32460	49185	28851	--	--
mws2523	421.1	1.19	422.06	C12H23O14P	[M-H]-	Trehalose 6-phosphate	Others	Saccharides and Alcohols	4484-88-2	B	13539	15780	18252	10232	11564	11251	7628.2	10400	6274.6	8510.5	8471.9	7800.8	8426.3	10307	6859.8	10800	C00689	ko00500,ko01100
mws2608	222.1	1.32	221.077	C8H15NO6	[M+H]+	N-Acetyl-D-galactosamine	Others	Others	1811-31-0	B	1085800	1017900	848920	1062200	1201700	1227500	1286300	1296200	1314000	1086000	1214300	1079600	1673300	1360400	1323500	1276400	--	--
mws2623	281.25	10.9	282.234	C18H34O2	[M-H]-	11-Octadecanoic acid(Vaccenic acid)	Lipids	Free fatty acids	506-17-2	A	139560	94122	109190	75704	160450	105200	477020	362280	516330	53117	94592	111000	235360	294060	244870	229950	--	--
mws2627	317.07	6.47	316.047	C16H12O7	[M+H]+	Tamarixetin	Flavonoids	Flavonols	603-61-2	A	160200	148590	165570	62441	29654	18450	9	9	9	84165	23473	30969	35616	26146	38730	30747	--	--
mws4085	223.07	4.51	224.058	C11H12O5	[M-H]-	Sinapic acid	Phenolic acids	Phenolic acids	530-59-6	B	6373.8	4854	4172.3	1817.8	5343.7	8992.1	74321	284220	126130	2980.1	3194.8	6136.7	30658	30627	26010	31066	C00482	ko00940,ko01100,ko01110
mws4134	611.15	1.75	612.121	C20H32N6O12S2	[M-H]-	Oxidized Glutathione	Amino acids and derivatives	Amino acids and derivatives	121-24-4	B	8948.6	5114.1	5264.9	2804.9	1191	1641.6	24358	58852	28410	2275.1	1487.7	1203.8	13455	13288	13666	10451	--	--
mws4163	665.2	1.35	666.184	C24H42O21	[M-H]-	1,1-Kestotetraose	Others	Saccharides and Alcohols	13133-07-8	A	20735	17272	13012	23760	24741	37127	70749	61404	43070	17786	23920	20442	29012	28808	30492	32590	--	--
mws4167	463.09	4.41	462.062	C21H18O12	[M+H]+	Luteolin 7-O-glucuronide	Flavonoids	Flavonoid	29741-10-4	A	3579300	4258800	3119600	944480	1054300	602460	9	9	9	1816900	1379400	1695100	1384800	1117700	1529800	1302800	--	--
mws4170	179.06	1.32	180.053	C6H12O6	[M-H]-	D-Glucose	Others	Saccharides and Alcohols	14431-43-7	A	1960300	1664500	1765100	1951100	1322600	2046300	3986900	3839100	2854200	950210	1165100	1129200	2159900	2106900	2220900	2148300	--	--
mws5035	279.17	4.04	278.147	C15H22N2O3	[M+H]+	Leucylphenylalanine	Amino acids and derivatives	Amino acids and derivatives	56217-82-4	B	1769.3	1012.6	1660.5	25547	17911	31041	34876	54528	44361	21608	29116	27397	28412	38053	34220	27131	--	--
mws5037	203.14	2.9	202.118	C9H18N2O3	[M+H]+	Alanylleucine	Amino acids and derivatives	Amino acids and derivatives	1999-42-4	B	43850	48854	45450	9145.1	14930	10676	9	5476.4	9	32705	27012	36892	22797	18926	18487	15707	--	--
mws5038	341.11	1.32	342.096	C12H22O11	[M-H]-	Isomaltulose	Others	Saccharides and Alcohols	13718-94-0	A	3632300	3338800	3169400	2115500	1548200	2310500	2049000	1341600	1310400	2388900	1594100	2654200	1923000	1987300	1995800	1596900	--	--
mws5040	365.11	1.36	364.078	C12H21O11Na	[M+H]+	Turanose	Others	Saccharides and Alcohols	547-25-1	A	18708	20188	47129	53802	14138	27783	187650	310780	322490	31177	10375	34358	220200	317740	206190	168510	--	--
mws5041	189.12	2.36	188.103	C8H16N2O3	[M+H]+	Glycylisoleucine	Amino acids and derivatives	Amino acids and derivatives	19461-38-2	B	64668	52993	47415	49143	40572	56193	47093	59472	54120	53402	44490	45034	72203	68744	55787	66620	--	--
mws5042	223.11	2.76	222.089	C11H14N2O3	[M+H]+	Glycylphenylalanine	Amino acids and derivatives	Amino acids and derivatives	721-66-4	B	77873	81033	66507	52469	35391	59394	55135	81038	87594	53672	59331	51036	90762	81577	83849	77072	--	--
pmb0160	353.3	6.53	352.237	C21H36O4	[M+H]+	MAG(18:3)isomer5	Lipids	Glycerol ester	-	A	238680	304660	290050	287560	361700	313250	135100	109810	171220	214370	283180	307260	355460	228760	334450	222040	--	--
pmb0296	357.2	7.8	356.265	C21H40O4	[M+H]+	MAG(18:1)isomer2	Lipids	Glycerol ester	-	B	8349.6	6547.9	13763	7255.3	20589	16085	156690	146340	146740	6426.8	6787.4	7592.1	103290	163480	153380	123690	--	--
pmb0374	136.1	2.39	135.049	C5H5N5	[M+H]+	Aminopurine	Alkaloids	Alkaloids	452-06-2	A	24454	27999	23666	41162	28280	33964	23590	31225	25260	43316	19284	36325	33088	34494	25360	18735	--	--
pmb0475	671.2	4.58	670.143	C29H34O18	[M+H]+	Gallic acid O-feruloyl-O-hexosyl-O-hexoside	Flavonoids	Flavanols	-	B	7054.5	7733.8	9198.9	12106	6563.6	8910.9	8046.7	10147	11124	11592	10297	10069	7440.6	8135.5	6960.5	7017.9	--	--
pmb0484	104.1	1.24	103.091	C5H13NO	[M+H]+	Choline	Alkaloids	Alkaloids	62-49-7	A	10747000	8499200	2734300	8344900	9195100	4136200	13000000	26992000	23182000	11116000	13048000	8785000	14563000	16046000	17507000	15275000	C00114	ko00260,ko00564,ko01100,ko02010
pmb0492	584.2	2.99	583.268	C34H37N3O6	[M+H]+	N',N'',N'''-p-Coumaroyl-cinnamoyl-caffeoyl spermidine	Alkaloids	Phenolamine	-	B	51188	73383	39060	18552	7248.9	22234	629650	934230	477360	35459	15385	18103	353770	340700	314440	330210	--	--
pmb0530	664.2	1.64	663.08	C21H27N7O14P2	[M+H]+	Nicotinic acid adenine dinucleotide	Nucleotides and derivatives	Nucleotides and derivatives	53-84-9	B	35700	36823	31104	26619	19969	25948	61630	50164	48023	42082	26041	25460	55192	36683	39194	49892	C00003	ko00190,ko00730,ko00760,ko01100
pmb0550	449.1	3.06	449.089	C21H21O11	[M]+	Cyanidin 3-O-glucoside(Kuromanin)	Flavonoids	Anthocyanins	7084-24-4	A	1048900	1328000	453270	255550	211750	743640	5682.3	7427.1	10615	230990	792320	191080	425620	423760	380510	388210	C08604	ko00942
pmb0608	549.1	5.02	548.094	C25H24O14	[M+H]+	Chrysoeriol O-malonylhexoside	Flavonoids	Flavonoid	-	A	33603	27910	35110	13310	24174	14932	1492.4	1789.2	4906.9	21396	23860	31740	14412	12234	12821	12477	--	--
pmb0665	611.2	4.17	610.126	C27H30O16	[M+H]+	Luteolin 8-C-hexosyl-O-hexoside	Flavonoids	Flavonoid	-	B	199720	135380	128520	34721	43824	40551	9	9	9	48880	62099	108390	59616	46777	51734	62046	--	--
pmb0681	403.1	4.75	402.079	C20H18O9	[M+H]+	Apigenin 8-C-pentoside	Flavonoids	Flavonoid	-	B	9	9	9	9	9	9	11377	18761	10917	9	9	9	6435.7	9451.5	5061.6	5033.7	--	--
pmb0752	369.1	3.49	368.093	C17H20O9	[M+H]+	3-O-Feruloyl quinic acid	Phenolic acids	Phenolic acids	1899-29-2	B	192400	95109	115620	27478	30406	30190	12636	10875	20338	79127	101670	137480	67976	68645	63469	59885	C02572	--
pmb0764	144.1	3.12	143.033	C6H9NOS	[M+H]+	4-Methyl-5-thiazoleethanol	Others	Others	137-00-8	A	74932	46337	57466	87866	50257	60831	99196	172100	150560	74452	93144	60266	124980	104710	99865	95772	C04294	ko00730,ko01100
pmb0772	307.1	6.39	306.123	C19H18N2O2	[M+H]+	N-Cinnamoyl serotonin	Alkaloids	Phenolamine	-	B	42758	34750	34687	39671	38164	27313	920220	740880	652060	51198	43255	26403	449020	486820	490260	471420	--	--
pmb0774	177.2	2.05	176.086	C10H12N2O	[M+H]+	N-Hydroxy tryptamine	Others	Others	-	A	30651000	21271000	28460000	28533000	24824000	30919000	99987	621720	1081700	25624000	47609000	48501000	18946000	17664000	16846000	15670000	C17203	ko00380,ko01100
pmb0837	577.1	3.37	576.105	C30H24O12	[M+H]+	Procyanidin A3	Tannins	Proanthocyanidins	86631-39-2	A	13200	29606	9854.4	13093	15995	13368	330.68	781.16	9165.6	23415	16502	17016	39804	20964	19002	23815	--	--
pmb0854	518.3	6.94	517.282	C26H48NO7P	[M+H]+	LysoPC 18:3	Lipids	LPC	-	A	297170	344910	321910	298810	431690	526680	5155200	2996100	4231300	264220	301590	324260	2777700	2480500	2560700	2433900	--	--
pmb0855	496.3	7.74	495.296	C24H50NO7P	[M+H]+	LysoPC 16:0	Lipids	LPC	17364-16-8	A	1477300	1088400	855830	685350	969340	625740	19291000	11790000	15493000	998360	1495500	1165600	7102600	7078100	6950000	6898100	--	--
pmb0856	480.31	7.8	479.268	C23H46NO7P	[M+H]+	LysoPE 18:1(2n isomer)	Lipids	LPE	-	A	351220	549930	680350	320420	932130	760560	12102000	6522900	6583900	183160	210640	320590	6671200	6531800	6389400	5762800	--	--
pmb0863	492.3	6.29	491.268	C24H46NO7P	[M+H]+	LysoPC 16:2(2n isomer)	Lipids	LPC	-	B	6653.5	14426	8767	11406	12418	23201	449420	233900	404120	6837.4	9002.5	7582.5	268240	256430	211750	224160	--	--
pmb0864	426.3	6.63	425.224	C19H40NO7P	[M+H]+	LysoPE 14:0	Lipids	LPE	-	B	2271.5	1374.1	1072	1519.8	1415.5	1343.9	328570	148800	190880	1243.8	1187.6	1245	145360	134320	128680	117920	--	--
pmb0865	518.2	6.67	517.282	C26H48NO7P	[M+H]+	LysoPC 18:3(2n isomer)	Lipids	LPC	-	A	274970	314750	299170	272500	401880	417610	4543900	2486300	3581200	253100	261640	290640	2430000	2348200	2380200	2128400	--	--
pmb0874	478.6	7.32	477.253	C23H44NO7P	[M+H]+	LysoPE 18:2(2n isomer)	Lipids	LPE	-	A	91189	115080	117430	56263	142310	103420	745060	421260	593200	51784	67753	69764	585420	621790	709000	632880	--	--
pmb0876	454.2	7.68	453.253	C21H44NO7P	[M+H]+	LysoPE 16:0	Lipids	LPE	53862-35-4	A	303730	230250	239640	150630	256320	159740	1549500	954020	1148400	192860	277110	232170	739020	783430	733440	645770	--	--
pmb0889	279.3	7.91	278.205	C18H30O2	[M+H]+	Punicic acid	Lipids	Free fatty acids	544-72-9	B	41905	31002	30601	28543	58210	35218	420660	446620	403260	28584	50802	47793	261450	232390	217950	209730	C08364	--
pmb0890	355.1	9.45	354.251	C21H38O4	[M+H]+	MAG(18:2)	Lipids	Glycerol ester	-	A	673920	600660	654320	562310	696710	636230	3975500	4355400	3776100	689260	615580	848290	2746300	2677500	2213700	2204400	--	--
pmb0981	348.2	1.64	347.047	C10H14N5O7P	[M+H]+	Adenosine 5'-monophosphate	Nucleotides and derivatives	Nucleotides and derivatives	61-19-8	B	36533	41256	40665	105750	79456	74666	214470	168500	154740	167220	84537	105600	151260	107900	100380	133290	C00020	ko00230,ko00908,ko01100,ko01110
pmb1096	118	2.97	117.053	C8H7N	[M+H]+	Indole	Alkaloids	Plumerane	120-72-9	A	52521	41616	46731	50325	45356	38063	34365	44569	43367	37220	34581	32875	36396	41048	47491	34604	C00463	ko00380,ko00400,ko00402,ko01100,ko01110
pmb1605	353.3	7.55	352.237	C21H36O4	[M+H]+	MAG(18:3)isomer3	Lipids	Glycerol ester	-	A	368130	506750	308920	225050	310530	269740	69789	56444	115350	310750	608780	518640	301360	273940	265500	199790	--	--
pmb1656	353.1	8.85	352.237	C21H36O4	[M+H]+	MAG(18:3)isomer4	Lipids	Glycerol ester	-	A	23485	16218	25814	18076	22744	19093	33134	45775	37517	21300	18678	30224	31843	30858	31943	22943	--	--
pmb1912	474.2	2.92	473.144	C20H23N7O7	[M+H]+	10-Formyl-THF	Alkaloids	Alkaloids	2800-34-2	A	136840	174200	95500	182690	135620	185120	599030	760920	575900	196680	200770	125690	453430	360120	365520	325850	C00234	ko00670,ko00970,ko01100,ko01200
pmb2211	343.1	7.03	342.262	C19H38N2O3	[M+H]+	Cocamidopropyl βine	Alkaloids	Alkaloids	4292-10-8	A	45365	29909	29047	33191	46907	35013	75431	74058	80048	32631	56717	38156	44029	44910	42109	40725	--	--
pmb2260	480.31	6.66	479.268	C23H46NO7P	[M+H]+	LysoPC 15:1	Lipids	LPC	-	B	404	491.58	985.72	1023	1403.3	984.91	238820	103920	153030	624.58	1047.9	533.46	127540	105560	104450	88051	--	--
pmb2325	353.1	7.33	352.237	C21H36O4	[M+H]+	MAG(18:3)isomer2	Lipids	Glycerol ester	-	A	8317.4	9588.4	9334.1	7063.7	8017.2	9575.5	1040.8	1116	1993.4	5458.7	7361	6111.4	3486.7	3162.6	3131.4	2243.2	--	--
pmb2363	357.2	7.69	356.265	C21H40O4	[M+H]+	MAG(18:1)isomer1	Lipids	Glycerol ester	-	B	9292.2	12955	12368	7285.3	23697	18399	188270	126910	168530	7047.3	8793	8536.3	137800	121750	175080	123530	--	--
pmb2406	510.1	8.29	509.311	C25H52NO7P	[M+H]+	LysoPC 17:0	Lipids	LPC	-	A	11565	8825	6490.1	6688.9	10277	6243.9	168890	88227	108130	9849.4	16717	15397	60766	57721	58457	51728	--	--
pmb2444	353.2	9	352.237	C21H36O4	[M+H]+	MAG(18:3)isomer1	Lipids	Glycerol ester	-	A	530070	400710	717970	600440	473260	453150	613300	1692100	742730	519820	296880	498260	749680	674150	637270	642160	--	--
pmb2591	245	4.33	246.089	C13H14N2O3	[M-H]-	Acetyltryptophan	Amino acids and derivatives	Amino acids and derivatives	2280-01-5	A	66389	58412	59812	27879	36797	33027	1013200	1254500	970940	21189	21714	40041	645170	666570	731570	627380	C03137	--
pmb2620	207.1	5.99	208.064	C11H12O4	[M-H]-	3,4-Dimethoxycinnamic acid	Phenolic acids	Phenolic acids	14737-89-4	B	15183	14376	11166	26826	18888	26495	9319.4	6206.9	10457	27422	31490	18814	13605	15501	13895	14575	--	--
pmb2640	199	8.62	200.162	C12H24O2	[M-H]-	Lauric acid	Lipids	Free fatty acids	143-07-7	A	17529	14653	13960	9712.5	12470	10421	10174	12588	10607	13105	13535	16574	11873	12317	12815	12118	C02679	ko00061,ko01100
pmb2643	225	9	226.176	C14H26O2	[M-H]-	Myristoleic acid	Lipids	Free fatty acids	544-64-9	B	3696	2066	2035.4	1867.7	1819.9	1542.2	5001.2	7097.3	4230.5	2686	3477.4	3601.6	4167.1	3508.8	4046.1	3480.3	C08322	--
pmb2778	295	7.92	296.214	C18H32O3	[M-H]-	9,10-EODE	Lipids	Free fatty acids	65167-83-1	A	1115900	916020	769800	747760	1344500	746940	3354400	4465200	4732700	690810	1329100	1075700	5273300	5258600	5863900	5623300	--	--
pmb2786	293	7.37	294.199	C18H30O3	[M-H]-	9-HOTrE	Lipids	Free fatty acids	89886-42-0	B	25270	20686	17490	18758	26630	19721	25160	33806	31128	25074	41623	46350	29555	27057	28293	28132	--	--
pmb2792	293	6.77	294.199	C18H30O3	[M-H]-	13-HOTrE(r)	Lipids	Free fatty acids	74784-20-6	B	82784	127060	59865	51915	98605	68948	75579	77004	76601	89345	43093	47293	95871	88580	90766	89347	--	--
pmb2799	295	8.7	296.214	C18H32O3	[M-H]-	12,13-EODE	Lipids	Free fatty acids	6799-85-5	B	3391.4	3548.4	2892.3	2174.7	3781.1	2763.9	14658	19380	14647	2743.4	3162.1	2960	9153.4	8827.2	8878	9809.4	--	--
pmb2871	315.1	2.4	316.065	C13H16O9	[M-H]-	2,5-Dihydroxy benzoic acid O-hexside	Phenolic acids	Phenolic acids	-	A	750360	666140	569200	469950	179280	416620	56968	64873	46781	396670	407330	229050	176570	226300	231120	225640	--	--
pmb2922	565.1	1.62	566.029	C15H24N2O17P2	[M-H]-	Uridine 5'-diphospho-D-glucose	Nucleotides and derivatives	Nucleotides and derivatives	133-89-1	B	45514	32354	32186	56905	39497	46044	480490	453570	528550	36197	48099	27069	161230	174260	166330	165320	C00029	ko00040,ko00052,ko00053,ko00240,ko00500,ko00520,ko00561,ko00908,ko01100
pmb2936	591.1	5.38	592.152	C28H32O14	[M-H]-	Disinapoyl hexoside	Phenolic acids	Phenolic acids	-	B	30134	34658	28017	16145	15002	15949	9	9	9	24254	24156	49455	12251	10163	12569	10566	--	--
pmb2940	385.1	3.65	386.102	C17H22O10	[M-H]-	1-O-β-D-Glucopyranosyl sinapate	Phenolic acids	Phenolic acids	78185-48-5	A	304350	104230	313570	76729	165290	149750	6710900	9519200	3912000	132990	150120	192080	2565300	2461700	2542300	2536900	--	--
pmb2947	865.1	4.01	866.172	C45H38O18	[M-H]-	Catechin-catechin-catechin	Tannins	Proanthocyanidins	-	A	49026	67986	49525	27840	48468	32972	9	9	9	31264	39454	34895	20895	20017	19115	13699	--	--
pmb2957	465.1	3	466.073	C24H18O10	[M-H]-	Cyanidin O-syringic acid	Flavonoids	Anthocyanins	-	B	53169	79554	20873	20770	17967	58311	9	9	9	17265	50758	11386	31495	32155	31858	32858	--	--
pmb2999	461.1	4.3	462.096	C22H22O11	[M-H]-	Chrysoeriol 5-O-hexoside	Flavonoids	Flavonoid	-	B	74970	75148	89295	34312	25992	23581	9	9	9	40641	40348	42672	36230	37993	40701	48375	--	--
pmb3000	503.1	4.44	504.105	C24H24O12	[M-H]-	Chrysoeriol O-acetylhexoside	Flavonoids	Flavonoid	-	B	7821.6	4743.8	9233.1	6157.6	8580.6	8325.5	13792	20717	22088	6804.6	10513	10045	13138	11584	11306	12153	--	--
pmb3006	431.1	4.61	432.088	C21H20O10	[M-H]-	Apigenin 7-O-glucoside(Cosmosiin)	Flavonoids	Flavonoid	578-74-5	B	6636.4	7317.9	7658.5	15040	21286	24218	12791	14865	8920.9	9102.5	12313	9488.8	14483	14378	9632.2	10274	C04608	ko00944
pmb3013	519.1	4.78	520.1	C24H24O13	[M-H]-	Isorhamnetin O-acetyl-hexoside	Flavonoids	Flavonols	-	B	39981	13930	34567	891.51	1988.6	9	9	9	3311.8	2288.4	1727.8	5689	7388.9	6044.4	5389.4	5626.6	--	--
pmb3023	449.1	3.8	450.096	C21H22O11	[M-H]-	Eriodictyol C-hexoside	Flavonoids	Dihydroflavone	-	B	585960	467030	1087200	282500	373480	326640	11457	8617.2	18010	427530	355620	362100	178520	213610	202190	181080	--	--
pmb3026	505.1	4.41	506.085	C23H22O13	[M-H]-	Quercetin O-acetylhexoside	Flavonoids	Flavonoid	-	B	22677	26867	23281	48900	46336	57710	2657	2349.7	1190.5	42273	48675	48524	20166	24112	25387	22699	--	--
pmb3041	521.1	4.24	522.08	C23H22O14	[M-H]-	Tricin O-saccharic acid	Flavonoids	Flavonoid	-	B	683790	704420	791870	979160	761990	916770	346920	291780	347340	688330	845400	776180	411170	456160	371850	303500	--	--
pmb3042	491.1	4.44	492.105	C23H24O12	[M-H]-	Tricin 5-O-hexoside	Flavonoids	Flavonoid	-	B	370890	488350	419500	539400	301740	391420	124500	109400	140270	546240	582050	462220	221180	217410	212390	261600	--	--
pmb3066	481.1	3.02	482.12	C22H26O12	[M-H]-	5-O-p-Coumaroyl shikimic acid O-hexoside	Phenolic acids	Phenolic acids	-	A	2745.2	2000.3	3173	6300.1	5171.3	4505.1	30207	37767	27904	5213.7	4440.9	2868.1	13749	13494	15103	14972	--	--
pmb3074	337.1	3.96	338.085	C16H18O8	[M-H]-	3-O-p-Coumaroyl quinic acid	Phenolic acids	Phenolic acids	1899-30-5	A	8812100	7657100	8831600	3347500	5577200	5679000	191310	100150	423970	5885900	6987800	6544700	3547500	3953500	3487500	3631800	C12208	ko00940,ko00941,ko00945,ko01110
pmb3081	289.1	1.59	289.99	C6H11PO11	[M-H]-	Glucarate O-Phosphoric acid	Others	Saccharides and Alcohols	-	B	763400	628510	509670	562660	689760	639620	431520	337830	477460	533660	838290	516170	567230	494180	546430	366130	--	--
pmb3894	329.1	6.36	330.061	C17H14O7	[M-H]-	Di-O-methylquercetin	Flavonoids	Flavonols	2068-02-2	B	10582	10227	5883	10603	8981.9	13757	53259	57253	81633	10566	13399	9401.6	43714	40689	46147	45332	C01265	ko00944
pmd0130	468.3	6.5	467.268	C22H46NO7P	[M+H]+	LysoPC 14:0(2n isomer)	Lipids	LPC	-	B	518.68	1120.9	765.03	408.88	878.02	855.8	112280	63452	83111	519.07	613.89	674.96	53480	45530	45605	43343	--	--
pmd0132	496.33	7.57	495.296	C24H50NO7P	[M+H]+	LysoPC 16:0(2n isomer)	Lipids	LPC	-	B	111600	115640	113250	72366	123100	106450	8066600	5249000	5327300	64519	95996	96167	3653400	3414800	3292300	3255800	--	--
pmd0136	524.36	8.69	523.325	C26H54NO7P	[M+H]+	LysoPC 18:0	Lipids	LPC	-	B	9215.1	9158.5	7143.1	4554	12426	8414.7	476820	221220	256140	7102.4	10076	10133	153440	158920	148540	146570	--	--
pmd0160	452.3	7.55	453.253	C21H44NO7P	[M-H]-	LysoPE 16:0(2n isomer)	Lipids	LPE	-	A	38758	33145	42802	19970	36753	26131	288500	179150	187180	17852	27878	19513	195200	210260	222670	203850	--	--
pme0006	116.1	1.29	115.056	C5H9NO2	[M+H]+	L-Proline	Amino acids and derivatives	Amino acids and derivatives	147-85-3	B	79424	53748	71697	602060	270890	306430	738420	528020	1037000	239310	317330	302610	347400	433850	417520	413700	C00148	ko00330,ko00332,ko00970,ko01100,ko01110,ko01230,ko02010
pme0008	176.1	1.26	175.084	C6H13N3O3	[M+H]+	L-Citrulline	Amino acids and derivatives	Amino acids and derivatives	372-75-8	B	19172	10675	16315	30855	35325	33067	26788	21799	28872	24070	25782	25834	30497	34662	27514	20645	C00327	ko00220,ko01100,ko01110,ko01230
pme0014	148.1	1.33	147.045	C5H9NO4	[M+H]+	L-Glutamic acid	Amino acids and derivatives	Amino acids and derivatives	56-86-0	B	124510	128420	95487	102240	111400	174840	201380	199880	289970	170480	182410	162150	213390	186040	190050	196660	C00025	ko00220,ko00250,ko00330,ko00332,ko00340,ko00430,ko00480,ko00630,ko00650,ko00660,ko00860,ko00910,ko00970,ko00998,ko01100,ko01110,ko01200,ko01210,ko01230,ko02010
pme0021	166	2.49	165.07	C9H11NO2	[M+H]+	L-Phenylalanine	Amino acids and derivatives	Amino acids and derivatives	63-91-2	A	18765000	19337000	13284000	15992000	12634000	16374000	29481000	32609000	36432000	24254000	29066000	31807000	36260000	33421000	28972000	31237000	C00079	ko00360,ko00400,ko00460,ko00940,ko00960,ko00966,ko00970,ko01100,ko01110,ko01210,ko01230,ko02010
pme0026	147	1.18	146.095	C6H14N2O2	[M+H]+	L-(+)-Lysine	Amino acids and derivatives	Amino acids and derivatives	56-87-1	B	56142	54829	40895	32992	33844	46028	64496	64301	76956	34716	35273	41709	58581	58008	50012	41881	C00047	ko00300,ko00310,ko00780,ko00960,ko00970,ko01100,ko01110,ko01210,ko01230,ko02010
pme0033	137	1.63	136.033	C5H4N4O	[M+H]+	Hypoxanthine	Nucleotides and derivatives	Nucleotides and derivatives	68-94-0	B	29663	18515	16631	21621	16961	25847	28608	25798	32745	31999	33714	31167	32368	24275	20144	24029	C00262	ko00230,ko01100
pme0040	136.1	1.62	135.049	C5H5N5	[M+H]+	Adenine	Nucleotides and derivatives	Nucleotides and derivatives	73-24-5	A	4584600	2669800	2271800	2593800	2713500	2326300	5041900	6402200	6614600	5493000	5944700	5084400	6795400	5252400	4961500	5013900	C00147	ko00230,ko00908,ko01100
pme0085	359.3	4.65	360.07	C18H16O8	[M-H]-	Rosmarinic acid	Phenolic acids	Phenolic acids	537-15-5	A	3838300	4017900	3962200	4451900	4160800	4564400	4306300	4464100	4249400	4478800	4232800	4256800	4169000	4160800	4177200	4132900	C01850	ko00350,ko01100
pme0120	118.2	1.3	117.07	C5H11NO2	[M+H]+	5-Aminovaleric acid	Amino acids and derivatives	Amino acids and derivatives	660-88-8	B	3626.5	5219.8	3204.7	5009.3	2126.3	3217.6	34516	39769	40047	7124.5	5760.4	10388	16396	23307	12077	17034	C00431	ko00310,ko00330,ko01100
pme0122	189.2	1.52	188.103	C8H16N2O3	[M+H]+	N6-Acetyl-L-lysine	Amino acids and derivatives	Amino acids and derivatives	692-04-6	B	2485.6	3446	4693.1	6040.9	5195.9	6931.1	9957.1	10242	15478	1366.9	1550.9	2416.2	13232	9389.6	7544.2	7644.5	C02727	ko00310,ko01100
pme0181	170.1	1.22	169.076	C7H11N3O2	[M+H]+	1-Methylhistidine	Amino acids and derivatives	Amino acids and derivatives	332-80-9	B	39931	18940	17518	43303	57789	64672	89992	83691	95876	54424	41875	39928	96524	90270	61307	62986	C01152	ko00340,ko01100
pme0183	152.1	1.35	151.043	C5H5N5O	[M+H]+	2-Hydroxy-6-aminopurine	Nucleotides and derivatives	Nucleotides and derivatives	3373-53-3	B	5757.5	3885.1	3341.2	45100	29409	32171	56813	63630	71976	12126	18028	19234	35323	39205	34462	36195	--	--
pme0193	147.07	1.18	146.06	C5H10N2O3	[M+H]+	L-Glutamine	Amino acids and derivatives	Amino acids and derivatives	56-85-9	B	88225	86531	65788	59138	56279	84145	120550	96248	138500	59516	66092	78367	93494	115490	95550	81486	C00064	ko00220,ko00230,ko00240,ko00250,ko00630,ko00910,ko00970,ko01100,ko01230,ko02010
pme0230	268.1	2.38	267.084	C10H13N5O4	[M+H]+	Adenosine	Nucleotides and derivatives	Nucleotides and derivatives	58-61-7	A	8808300	11889000	10361000	12435000	10514000	12281000	8334800	10283000	9276700	15349000	10026000	16782000	11240000	11295000	10980000	10693000	C00212	ko00230,ko01100,ko02010
pme0241	123.04	5.03	122.032	C7H6O2	[M+H]+	Benzoic acid	Phenolic acids	Phenolic acids	65-85-0	A	26190	17291	31572	32984	33173	21212	19941	17250	29475	27202	23217	25974	29005	32261	33193	30694	C00180	ko00360,ko01100,ko01110
pme0253	174.1	4	173.094	C8H15NO3	[M+H]+	N-Acetyl-L-leucine	Amino acids and derivatives	Amino acids and derivatives	1188-21-2	B	11345	15381	12621	10372	8028	9721.7	72176	106740	76450	11751	11101	8228.6	56870	54800	41113	45103	C02710	--
pme0256	151.03	1.67	152.028	C5H4N4O2	[M-H]-	Xanthine	Nucleotides and derivatives	Nucleotides and derivatives	69-89-6	B	58137	88615	30519	40316	27936	70622	38673	48918	48540	21473	34551	14668	40237	43267	52341	35395	C00385	ko00230,ko00232,ko01100,ko01110
pme0257	111.03	1.5	112.023	C4H4N2O2	[M-H]-	Uracil	Nucleotides and derivatives	Nucleotides and derivatives	66-22-8	B	8872.3	8300.6	8876.6	25535	11567	16673	82581	150350	121930	17199	26117	14146	36075	60413	52775	48392	C00106	ko00240,ko00410,ko00770,ko01100
pme0264	243.09	2.58	242.078	C10H14N2O5	[M+H]+	Thymidine	Nucleotides and derivatives	Nucleotides and derivatives	50-89-5	B	14489	19517	14868	16908	12369	18307	37824	45739	51913	12769	16440	10418	40066	36116	34257	36088	C00214	ko00240,ko01100
pme0271	115.01	1.76	116.006	C4H4O4	[M-H]-	Maleic acid	Organic acids	Organic acids	110-16-7	B	681.09	611.38	483.45	3385.7	1256.4	2223.4	29061	38729	37186	1072.1	2369.2	1782.8	10354	11559	10524	8783.3	C01384	ko00350,ko00650,ko00760,ko01100
pme0274	132.09	1.5	131.085	C6H13NO2	[M+H]+	6-Aminocaproic acid	Organic acids	Organic acids	60-32-2	B	111860	84143	99333	397960	149700	285670	928800	953240	1326400	144380	207220	235110	629510	663980	499860	583560	C02378	ko01100
pme0281	165.03	3.5	166.021	C8H6O4	[M-H]-	Terephthalic acid	Phenolic acids	Phenolic acids	100-21-0	B	550030	546900	570330	468720	516240	626390	1578600	1644900	1382900	524350	588140	568910	703060	672110	704060	822870	C06337	ko01100
pme0282	165.03	3.48	166.021	C8H6O4	[M-H]-	Phthalic acid	Organic acids	Organic acids	88-99-3	A	48131	47808	60456	57405	52995	56912	95877	108200	89694	52347	60821	55794	67172	76439	72364	67825	C01606	ko01100,ko02010
pme0369	593.16	4.29	594.132	C27H30O15	[M-H]-	Kaempferol 3-O-rutinoside(Nicotiflorin)	Flavonoids	Flavonols	17650-84-9	A	1499500	1363500	1264800	251020	248190	206830	1425	2299.2	3486.2	492340	371500	921730	316680	320630	382630	333150	--	--
pme0434	577	3.37	578.12	C30H26O12	[M-H]-	Procyanidin B2	Tannins	Proanthocyanidins	29106-49-8	A	481640	825400	405570	666240	967830	797540	33304	110420	897690	424200	622110	526650	452970	528210	430180	467740	--	--
pme0443	493	3.37	493.112	C23H25O12	[M]+	Malvidin 3-O-galactoside	Flavonoids	Anthocyanins	30113-37-2	B	1096.8	879.36	727.31	2244.7	526.11	1935.8	10675	8668.1	5931.4	837.56	1294.3	944.45	5261.3	4565	5123.3	4053.7	--	--
pme0460	291	3.77	290.067	C15H14O6	[M+H]+	L-Epicatechin	Flavonoids	Flavanols	490-46-0	A	448720	526640	397790	537070	425320	466450	6467.1	7337.2	50627	483890	459620	377890	184800	193760	195060	181130	C09727	ko00941,ko01100,ko01110
pme0490	124	1.61	123.027	C6H5NO2	[M+H]+	Nicotinic acid	Others	Vitamin	59-67-6	A	85082	66388	62677	50944	42508	40839	500490	551270	475040	83347	55910	56765	250450	210950	181870	194820	C00253	ko00760,ko00960,ko01100,ko01110
pme0513	151	1.27	152.058	C5H12O5	[M-H]-	Xylitol	Others	Saccharides and Alcohols	87-99-0	B	48516	38735	50537	55810	53142	47243	88423	70581	88547	40772	48892	42619	63278	59148	63170	65637	C00379	ko00040,ko01100,ko02010
pme0516	179.16	1.24	180.053	C6H12O6	[M-H]-	Inositol	Others	Saccharides and Alcohols	87-89-8	A	400530	450820	377000	339640	305850	344070	246390	282440	323630	250840	391270	276590	313880	317720	341600	359560	C00137	ko00052,ko00053,ko00562,ko01100,ko02010,ko04070
pme0519	341	1.28	342.096	C12H22O11	[M-H]-	D-(+)-Sucrose	Others	Saccharides and Alcohols	57-50-1	A	12080000	13676000	12615000	8670600	7616400	8201300	6814400	6530800	7710700	8755800	8747700	9887700	7626100	7714000	8545500	8745600	--	--
pme0534	195.16	1.2	196.047	C6H12O7	[M-H]-	Gluconic acid	Others	Saccharides and Alcohols	526-95-4	B	82863	72831	82130	31126	33186	37747	165670	161560	144040	32775	37806	44950	68233	66798	70247	68460	C00257	ko00030,ko01100,ko01110,ko01200
pme1002	138.08	1.7	137.076	C8H11NO	[M+H]+	L-Tyramine	Amino acids and derivatives	Amino acids and derivatives	51-67-2	B	4146.7	8844.5	1809.1	2508.4	2690.7	27214	5302.3	32967	68634	35578	16573	105040	70880	58864	65609	47909	C00483	ko00350,ko00950,ko01100,ko01110
pme1109	152	1.65	151.043	C5H5N5O	[M+H]+	Guanine	Nucleotides and derivatives	Nucleotides and derivatives	73-40-5	A	192270	111790	180420	541890	436020	350160	495530	618440	545380	233070	258910	300120	476940	417360	347660	381740	C00242	ko00230,ko01100
pme1178	284.09	1.96	283.078	C10H13N5O5	[M+H]+	Guanosine	Nucleotides and derivatives	Nucleotides and derivatives	118-00-3	A	669940	646610	421210	414050	330500	445260	1574300	1491700	1885900	455230	510720	422290	1176100	1232700	1116900	1095700	C00387	ko00230,ko01100,ko02010
pme1184	268.1	2.18	267.084	C10H13N5O4	[M+H]+	Deoxyguanosine	Nucleotides and derivatives	Nucleotides and derivatives	961-07-9	B	52380	50598	40701	28550	26782	35865	127230	109580	128120	28232	34096	20548	100970	97584	87148	87552	C00330	ko00230,ko01100,ko02010
pme1201	273.08	6.02	274.073	C15H14O5	[M-H]-	Phloretin	Flavonoids	Chalcones	60-82-2	A	1682600	1877400	1891800	3104000	1500100	1846300	1877.2	2607.6	23089	1700000	1591000	1630200	856950	848180	772880	774890	C00774	ko00941,ko01110
pme1210	150	1.68	149.042	C5H11NO2S	[M+H]+	L-Methionine	Amino acids and derivatives	Amino acids and derivatives	63-68-3	B	102050	104510	79919	144310	105860	170150	156430	145090	167860	154930	119000	121600	168810	154410	148840	143050	C00073	ko00270,ko00966,ko00970,ko01100,ko01110,ko01210,ko01230
pme1286	385	1.81	384.103	C14H20N6O5S	[M+H]+	S-(5'-Adenosy)-L-homocysteine	Amino acids and derivatives	Amino acids and derivatives	979-92-0	B	18612	23203	18951	16340	13775	16828	16159	17533	19263	18347	16833	13632	20837	18872	14559	18216	C00021	ko00270,ko01100,ko01230
pme1383	170.1	1.61	169.065	C8H11NO3	[M+H]+	Pyridoxine	Others	Vitamin	65-23-6	B	56917	74262	40759	210960	145980	219890	99228	119430	109920	97583	167270	55878	202000	147180	143030	143920	C00314	ko00750,ko01100
pme1419	164	2.27	199.032	C6H14ClNO2S	[M-Cl]+	L-Methionine methyl ester	Amino acids and derivatives	Amino acids and derivatives	2491-18-1	B	46500	48295	46810	21524	24044	20219	20617	25166	22543	32617	30833	33081	34936	29701	32184	28588	--	--
pme1439	165.05	4.29	164.041	C9H8O3	[M+H]+	p-Coumaric acid	Phenolic acids	Phenolic acids	501-98-4	B	57213	28518	38047	75393	63076	87662	30936	44989	50574	50004	89418	43900	86288	61980	51138	45501	C00811	ko00130,ko00350,ko00940,ko00950,ko00999,ko01100,ko01110
pme1474	298	3.35	297.075	C11H15N5O3S	[M+H]+	5'-Deoxy-5'-(methylthio)adenosine	Nucleotides and derivatives	Nucleotides and derivatives	2457-80-9	A	628570	2183400	2838200	4030900	2018300	4696500	7966600	7901700	4660200	893340	743260	648920	3644000	4050100	3423600	3441500	C00170	ko00270,ko00908,ko01100
pme1605	593.16	4.16	594.132	C27H30O15	[M-H]-	Kaempferol 3-O-robinobioside(Biorobin)	Flavonoids	Flavonols	17297-56-2	B	1471200	1355700	1171800	234620	232100	163090	9	9	9	390380	359820	828680	224330	292210	305030	242770	--	--
pme1611	433.12	4.22	434.102	C21H22O10	[M-H]-	Isohemiphloin	Flavonoids	Flavonoid carbonoside	3682-02-8	A	65219	16592000	159820	63092	113170	271010	15832	12714	91554	57981	456170	148400	2598900	2828000	2612200	2808200	--	--
pme1691	147.12	1.27	146.106	C7H16NO2	[M+H]+	Acetylcholine	Alkaloids	Alkaloids	60-31-1	B	13894	17869	34056	18503	22040	24381	57889	44211	53918	22152	19926	26183	64243	48249	55504	39837	C08201	--
pme1816	353	3.08	354.079	C16H18O9	[M-H]-	Neochlorogenic acid(5-O-Caffeoylquinic acid)	Phenolic acids	Phenolic acids	906-33-2	B	7924700	7989900	8126300	5170300	7363300	6849500	464120	326080	1443200	7161300	6442000	7614000	4655400	4307800	3960100	4174300	C17147	--
pme2024	177	2.08	176.086	C10H12N2O	[M+H]+	Serotonin	Alkaloids	Plumerane	50-67-9	A	43629000	30655000	39848000	42097000	35032000	42242000	135180	875700	1482200	35347000	64363000	70336000	26074000	24334000	23469000	22941000	C00780	ko00380,ko01100
pme2237	181.08	1.25	182.067	C6H14O6	[M-H]-	Dulcitol	Others	Saccharides and Alcohols	608-66-2	B	41966	38710	41879	55673	56622	53160	137020	115880	116820	38019	51332	42356	81151	81120	82822	77779	C01697	ko00052,ko01100
pme2246	301	4.25	301.998	C14H6O8	[M-H]-	Ellagic acid	Others	Others	476-66-4	B	9	9	9	9	9	9	61915	70069	54144	6655.3	5985.5	4956.5	30176	25732	19297	24999	C10788	--
pme2433	106	1.18	105.07	C4H11NO2	[M+H]+	Diethanolamine	Others	Others	111-42-2	B	14029	8224.7	11923	16252	10257	10977	9366.6	13223	15094	13044	15370	15323	10597	13341	14949	12265	C06772	ko00564
pme2459	449.1	4.27	448.082	C21H20O11	[M+H]+	Luteolin 7-O-glucoside(Cynaroside)	Flavonoids	Flavonoid	5373-11-5	B	1009400	2113500	1588400	4420000	5202200	4701200	1795200	2479300	2019700	3709800	3864500	2961100	2435700	2083400	2403300	2402900	C03951	ko00944
pme2482	139.1	3.51	138.026	C7H6O3	[M+H]+	Protocatechuic aldehyde	Flavonoids	Flavanols	139-85-5	A	157210	115560	159450	326530	176180	277660	324790	344660	371310	273810	356040	288130	359180	325350	270650	291830	C16700	ko00950
pme2566	217	1.64	218.078	C8H14N2O5	[M-H]-	(5-L-Glutamyl)-L-amino acid	Amino acids and derivatives	Amino acids and derivatives	5875-41-2	B	1250.2	1045.9	515.58	1905.8	2276.9	2668	6757.4	8549.8	9128.5	2481.2	1306.1	2073.2	5472.4	4267.2	3620.6	6200.9	C03740	ko00480,ko01100
pme2596	184.05	2.17	183.045	C8H9NO4	[M+H]+	4-Pyridoxic acid	Others	Vitamin	82-82-6	B	30013	38324	27452	23474	22356	17711	4567.1	7503.4	3004.3	22964	15439	23467	23626	14165	15820	19218	C00847	ko00750,ko01100
pme2617	166	1.15	165.036	C5H11NO3S	[M+H]+	Methionine sulfoxide	Amino acids and derivatives	Amino acids and derivatives	62697-73-8	B	1931900	1630300	1464300	1846500	1939600	1881300	2202900	2042800	2154300	1969600	2068600	1876900	2407000	2098700	2283000	1741000	--	--
pme2758	162	1.28	163.039	C5H9NO5	[M-H]-	4-Hydroxy-L-glutamic acid	Amino acids and derivatives	Amino acids and derivatives	3913-68-6	B	9	9	9	7262	5859.8	5232.3	48667	41518	28231	4030.5	3991.4	4133.7	15939	11433	17016	16562	C03079	--
pme2801	167	2.24	166.042	C6H6N4O2	[M+H]+	7-Methylxanthine	Nucleotides and derivatives	Nucleotides and derivatives	552-62-5	B	2119	1090.3	1999.9	1081.2	1921.7	1157	4317.6	3948.9	3329.3	1918.9	1877.8	1793.4	3943.4	2466.9	2599.6	3706.1	C16353	ko00232,ko01100,ko01110
pme2836	178.08	3.36	177.07	C10H11NO2	[M+H]+	5-Hydroxytryptophol	Alkaloids	Plumerane	154-02-9	A	42328	26785	72965	10228	20377	13082	16432	33451	18052	12956	35033	41624	29555	24450	25860	27357	--	--
pme2890	269	1.31	268.041	C8H16N2O4S2	[M+H]+	L-Homocystine	Amino acids and derivatives	Amino acids and derivatives	626-72-2	B	9922.3	6111.2	10864	6358.9	12430	10858	5628.8	5832.5	8689.3	7310.1	7084.5	10199	7259.8	11346	9765.3	6476.2	C01817	ko00270
pme2954	303.04	5.58	302.033	C15H10O7	[M+H]+	Quercetin	Flavonoids	Flavonols	117-39-5	A	954380	1129200	1024000	673180	919840	682130	267580	312620	473140	835250	896040	1024600	569210	649640	698450	513830	C00389	ko00941,ko00944,ko01100,ko01110
pme2987	147.1	6.08	148.046	C9H8O2	[M-H]-	3,4-Dihydrocoumarin	Lignans and Coumarins	Coumarins	119-84-6	B	21875	45177	16706	12580	10096	10660	3410.8	4832	4564.2	20913	28761	8158.8	9411.2	10353	9458.9	10527	C02274	--
pme2993	193.1	4.5	192.035	C10H8O4	[M+H]+	Scopoletin(7-Hydroxy-5-methoxycoumarin)	Lignans and Coumarins	Coumarins	92-61-5	B	238680	167420	389830	351670	381100	470850	215290	287030	275670	248940	332810	392300	351740	335580	302810	294560	C01752	ko00940,ko01110
pme3007	403	1.18	403.985	C9H14N2O12P2	[M-H]-	Uridine 5’-diphosphate	Nucleotides and derivatives	Nucleotides and derivatives	27821-45-0	B	6262.4	7149.9	4859.3	7449.8	7984.6	8732.6	11599	10141	10406	10297	10153	9956.9	12636	7908.2	6804.4	6654.5	C00015	ko00240,ko00908,ko01100
pme3011	104.06	1.27	103.056	C4H9NO2	[M+H]+	γ-Aminobutyric acid	Organic acids	Organic acids	56-12-2	B	10896	4117.7	12301	35312	12043	20759	1024500	1440600	1134400	44176	48560	27327	476380	536440	515860	427020	C00334	ko00250,ko00330,ko00410,ko00650,ko00760,ko01100
pme3017	104	1.24	103.056	C4H9NO2	[M+H]+	2-Aminoisobutyric acid	Amino acids and derivatives	Amino acids and derivatives	62-57-7	B	1166500	936630	262210	705440	712050	388250	1375700	2656800	2235600	1046600	1255800	859350	1421900	1554200	1738600	1497400	C03665	--
pme3033	104	1.25	103.056	C4H9NO2	[M+H]+	N,N-Dimethylglycine	Amino acids and derivatives	Amino acids and derivatives	1118-68-9	B	106340	77856	23342	111680	76486	50710	811950	1178000	1073500	144840	177270	109570	413130	541180	496330	432230	C01026	ko00260,ko01100
pme3148	400.33	7.17	399.304	C23H45NO4	[M+H]+	L-Palmitoylcarnitine	Alkaloids	Alkaloids	2364-67-2	A	1280.9	1413.5	502.11	819.85	558.3	362.55	974.97	1189.8	867.94	757.38	401.48	1358	1337.2	978.2	1143.7	1074.2	C02990	ko00071,ko01212
pme3184	332	1.64	331.053	C10H14N5O6P	[M+H]+	2'-Deoxyadenosine-5'-monophosphate	Nucleotides and derivatives	Nucleotides and derivatives	653-63-4	B	322820	366200	217030	353080	385390	464990	1006500	1110900	842410	562640	490290	527920	784760	740930	685260	661130	C00360	ko00230,ko01100
pme3188	323	1.73	324.021	C9H13N2O9P	[M-H]-	Uridine 5'-monophosphate	Nucleotides and derivatives	Nucleotides and derivatives	58-97-9	B	6842.5	7318.7	4413.7	5500.8	4522.9	2404.2	55540	60712	67169	5227.9	7160.4	3492.8	25234	24946	30704	30059	C00105	ko00240,ko01100
pme3211	463	4.31	464.076	C21H20O12	[M-H]-	Quercetin 3-O-glucoside(Isotrifoliin)	Flavonoids	Flavonols	21637-25-2	A	7094100	6204600	8294200	1692000	1749300	1309800	5263.1	13532	29533	2440900	2187000	2457600	2010500	2032900	1664200	1904100	C05623	ko00944,ko01100,ko01110
pme3285	275	3.78	274.073	C15H14O5	[M+H]+	Afzelechin(3,5,7,4'-Tetrahydroxyflavan)	Flavonoids	Isoflavones	2545-00-8	A	186120	163400	141750	106650	93440	98173	4892.9	4797.9	17966	191750	156360	161810	61612	63182	68038	81247	C09320	ko00941,ko01110
pme3337	384	2.67	383.09	C14H17N5O8	[M+H]+	N6-Succinyl Adenosine	Nucleotides and derivatives	Nucleotides and derivatives	4542-23-8	A	205590	218130	160610	243180	173860	188730	1224400	1565300	842450	212130	217530	230950	704030	686180	575470	633900	--	--
pme3382	160	1.71	161.059	C6H11NO4	[M-H]-	N-Acetylthreonine	Amino acids and derivatives	Amino acids and derivatives	17093-74-2	B	1425.8	1360.7	1171.4	3334.8	2803.2	2800.2	6988.3	7237.3	7486.2	1760	2694	1362.9	3827.1	3122.1	4392	4230.1	--	--
pme3388	189	1.18	188.114	C7H16N4O2	[M+H]+	H-HomoArg-OH	Amino acids and derivatives	Amino acids and derivatives	156-86-5	B	3667.4	4143	3993.2	3088.2	6175.3	6000.2	19931	18411	27867	2679.3	4255.3	2074.3	11689	11075	19220	14429	C01924	--
pme3443	207.1	4.93	208.064	C11H12O4	[M-H]-	Sinapinaldehyde	Phenolic acids	Phenolic acids	4206-58-0	B	7846.9	5690.4	6502.9	1134	2174.3	3119.2	317610	429200	372000	1700.5	2527.3	2140.4	54451	60427	58759	51788	--	--
pme3514	301	5.58	302.033	C15H10O7	[M-H]-	Morin	Flavonoids	Flavonols	6472-38-4	A	2361400	1286600	2301600	520080	320710	275050	4491.4	5121.9	6516.9	819210	479980	614170	407550	398590	416680	405090	C10105	--
pme3705	193.14	1.22	194.033	C6H10O7	[M-H]-	D-Glucoronic acid	Others	Saccharides and Alcohols	6556-12-3	B	48490	44733	44404	37608	45268	46890	17892	18719	22272	42632	36103	47067	27655	28209	23811	28211	C00191	ko00040,ko00053,ko00520,ko00562,ko01100
pme3732	244.09	1.32	243.073	C9H13N3O5	[M+H]+	Cytidine	Nucleotides and derivatives	Nucleotides and derivatives	65-46-3	B	7423.2	6252.9	2695.6	25231	25589	25454	79971	88448	144240	23708	27313	31963	69228	68996	62963	68027	C00475	ko00240,ko01100,ko02010
pme3961	252	2.46	251.089	C10H13N5O3	[M+H]+	Deoxyadenosine	Nucleotides and derivatives	Nucleotides and derivatives	958-09-8	B	130090	111980	137060	198960	104140	180030	530470	664470	702130	145010	172110	135990	437710	406670	409720	391390	C00559	ko00230,ko01100,ko02010
pme3967	312	2.73	311.107	C12H17N5O5	[M+H]+	2-(Dimethylamino)guanosine	Nucleotides and derivatives	Nucleotides and derivatives	2140-67-2	B	53238	58029	32327	18012	15077	25680	112550	100290	145710	20420	17600	14361	68705	81420	80978	69181	--	--
pmf0424	517.1	4.48	516.105	C25H24O12	[M+H]+	Isochlorogenic acid B	Phenolic acids	Phenolic acids	14534-61-3	B	261690	168900	344630	191690	171130	239940	11550	8434.7	116810	164420	306190	583300	249180	204730	161490	204010	--	--
pmf0440	163.1	6.54	162.061	C10H10O2	[M+H]+	4-MethoxycinnaMaldehyde	Phenolic acids	Phenolic acids	1963-36-6	B	275330	273320	309000	242740	181440	227640	110460	117080	127120	219500	203690	260180	202470	177790	207600	169370	--	--
pmf0608	161.03	4.65	162.026	C9H6O3	[M-H]-	Oxalic acid	Phenolic acids	Phenolic acids	93-35-6	B	928410	979720	997320	977580	962930	955630	842490	848000	920780	881650	906080	1012600	843530	833850	778880	795980	C09315	ko00940,ko01110
pmn001319	413.12	6.41	414.113	C22H22O8	[M-H]-	1-O-Feruloyl-3-O-p-Coumaroyl glycerol	Phenolic acids	Phenolic acids	-	A	592.21	677.39	729.44	462.54	636.68	715.14	4732.2	9536.1	6779.8	665.1	368.04	1865.8	3665.9	3429.7	3376.5	3258.2	--	--
pmn001367	315.07	2.39	316.065	C13H16O9	[M-H]-	Protocatechuic acid-4-glucoside	Phenolic acids	Phenolic acids	-	A	869260	671890	635800	494290	176500	522540	62210	173750	136900	472060	407270	336120	319860	353120	314630	279870	--	--
pmn001380	187.1	5.03	188.093	C9H16O4	[M-H]-	Eucommiol	Others	Others	55930-44-4	A	22992	16850	16182	30056	33661	30180	112100	98359	140510	21397	19429	23039	63322	73169	71896	66874	C17878	--
pmn001382	515.12	4.42	516.105	C25H24O12	[M-H]-	Isochlorogenic acid A	Phenolic acids	Phenolic acids	2450-53-5	A	251570	198820	338260	241580	193560	188620	14334	7597	41379	161950	431910	1446400	162700	178550	170820	158160	--	--
pmn001384	515.12	4.42	516.105	C25H24O12	[M-H]-	Isochlorogenic acid C	Phenolic acids	Phenolic acids	57378-72-0	B	344970	108180	247510	217540	147520	156790	9118.5	10022	54130	176540	292550	1114700	188730	223490	212300	192280	--	--
pmn001405	447.1	4.43	448.082	C21H20O11	[M-H]-	Luteolin-7-O-glucoside	Flavonoids	Flavonoid	5373-11-5	B	20982000	22643000	21540000	1629700	1714600	1482600	780680	642980	536490	3723300	2560500	4211600	3075000	3710100	4053200	3726500	C03951	ko00944
pmn001421	337.09	3.82	338.085	C16H18O8	[M-H]-	3-O-(E)-p-Coumaroyl quinic acid	Phenolic acids	Phenolic acids	87099-71-6	A	8407500	7701800	8376000	3055300	5867700	5530600	170000	114450	405460	5692500	6931200	6637100	3757300	3711700	4049800	3626900	--	--
pmn001426	487.24	6.45	488.317	C30H48O5	[M-H]-	Enscaphic acid	Terpenoids	Triterpene	53155-25-2	B	2256.2	2156.2	2863.9	3494.5	2916.7	2550.1	27260	27679	23107	1042.3	679.08	1292.7	17377	16144	14236	15539	--	--
pmn001477	435.1	4.31	436.082	C20H20O11	[M-H]-	4-C-β-D-Glucose-1,3,6-trihydroxy-7-methoxyxanthone	Others	Xanthone	-	B	192990	4959.1	166930	102500	924030	348360	4553.3	2380	11310	353090	561950	621440	128750	153030	146880	155860	--	--
pmn001495	329.2	6.4	330.251	C19H38O4	[M-H]-	Hexadecanoic acid 2,3-dihydroxypropyl ester	Lipids	Glycerol ester	542-44-9	B	10744	9178.6	6270.1	11181	9970.4	12636	48768	58180	80592	10276	14007	10087	42972	42597	40462	42067	--	--
pmn001552	177	3.83	178.021	C9H6O4	[M-H]-	Esculetin	Phenolic acids	Phenolic acids	305-01-1	A	60440	39934	56703	565930	336660	527010	577130	720780	659750	146740	546630	162030	446700	422980	440820	428550	C09263	--
pmn001578	255.23	10.72	256.219	C16H32O2	[M-H]-	Hexadecanoic acid	Phenolic acids	Phenolic acids	57-10-3	A	7217000	5958200	6905700	5879100	7440600	6587800	7778100	7615400	10466000	5832400	6152900	6543200	6379400	8544000	6761100	6577200	C00249	ko00061,ko00062,ko00071,ko00073,ko01040,ko01100,ko01212
pmn001583	609.1	4.06	610.126	C27H30O16	[M-H]-	Bioquercetin	Flavonoids	Flavonols	52525-35-6	A	1123500	1386900	1015800	491740	566240	660700	2097	975.43	7652.4	482090	916490	740940	790580	778580	714290	656230	--	--
pmn001590	187.1	5.48	188.093	C9H16O4	[M-H]-	Azelaic acid	Lipids	Free fatty acids	123-99-9	B	3155.6	4079.8	4061.6	4096.9	2577.2	3677.1	8468	4376.1	6025.6	3689.9	2575.6	2601.1	3604.8	3471.2	4312	4614.2	C08261	--
pmn001606	309.3	10.01	310.262	C20H38O2	[M-H]-	Eicosenoic acid	Lipids	Free fatty acids	26764-41-0	A	9470	11888	12287	13417	26337	25064	36795	28244	37402	11743	19281	13239	26869	28366	33391	24631	C16526	ko01040
pmn001610	307.3	11.09	308.248	C20H36O2	[M-H]-	Eicosadienoic acid	Lipids	Free fatty acids	5598-38-9	B	37315	24267	24529	23740	47896	28862	53217	44585	56087	25797	25663	30400	47043	45801	50551	46700	C16525	ko01040
pmn001611	253.2	9.9	254.205	C16H30O2	[M-H]-	Palmitoleic acid	Lipids	Free fatty acids	373-49-9	B	1378500	923960	1050400	728340	1311200	886310	2737700	2965400	2472800	869130	1184500	1521100	1805700	1937800	1801500	1764500	C08362	ko00061
pmn001615	402.09	4.07	403.097	C13H23NO9S2	[M-H]-	3-Methylamylthioglycoside	Others	Glucosinolates	-	B	69573	61768	66399	66652	39488	58903	25229	32852	32513	31889	37268	50845	46041	47481	44002	43602	--	--
pmn001639	447.1	4.68	448.082	C21H20O11	[M-H]-	Cynaroside	Flavonoids	Flavonoid	5373-11-5	A	6076700	5221700	6345200	593180	587330	492040	8037.9	5260.3	45208	887490	825200	1048200	837520	944230	1116100	1003700	--	--
pmn001646	865.2	3.82	866.172	C45H38O18	[M-H]-	Procyanidin C1	Tannins	Proanthocyanidins	37064-30-5	B	60332	78693	46028	69920	103240	68507	702.74	797.99	3449.6	50535	43752	59143	27476	33279	28226	32059	C17624	--
pmn001647	865.2	3.62	866.172	C45H38O18	[M-H]-	Procyanidin C2	Tannins	Proanthocyanidins	37064-31-6	B	112910	161550	76398	151290	209780	131410	1235.3	1804.5	18555	89816	109390	153810	81440	104060	90391	101330	--	--
pmn001650	1153.3	3.62	1154.22	C60H50O24	[M-H]-	Cinnamtannin B2	Tannins	Proanthocyanidins	88038-12-4	A	19583	29661	19570	20113	45142	27516	9	9	9	13052	11803	22304	17267	17991	15872	16507	C17629	--
pmn001661	381.2	3.9	382.177	C20H30O7	[M-H]-	Cinncassiol C1	Phenolic acids	Phenolic acids	73613-35-1	A	1273.1	3030.3	2202.8	3872.8	2192.6	3375.6	15407	13188	19543	1964.2	3828.9	2159.2	11296	12981	12022	8968.9	C17643	--
pmn001667	577.1	4.28	578.12	C30H26O12	[M-H]-	Procyanidin B4	Tannins	Proanthocyanidins	29106-51-2	A	450390	538800	196730	402870	405470	237560	9	9	9	255260	199510	252060	106880	110370	133810	118700	C10238	--
pmn001668	415.1	3.68	416.128	C22H24O8	[M-H]-	Apigenin-3-O-α-L-rhamnoside	Flavonoids	Flavonoid	-	A	142920	153150	139100	133090	104280	175280	155580	190260	167190	188000	208980	167820	153000	164900	182970	149390	--	--
pmn001669	237.1	6.08	238.073	C12H14O5	[M-H]-	Methyl sinapate	Phenolic acids	Phenolic acids	20733-94-2	B	34350	12387	29285	2314.6	9086.2	4774.9	18072	22002	14856	5106.7	7130.4	14712	17488	16742	21694	20179	--	--
pmn001680	163.04	2.86	164.041	C9H8O3	[M-H]-	Coumaric acid	Phenolic acids	Phenolic acids	500-05-0	A	1055900	1160300	546400	962410	880760	885390	169110	120400	133520	714100	882950	955140	1060500	1047300	1032600	1028000	--	--
pmn001686	287.23	6.64	288.208	C16H32O4	[M-H]-	10,16-Dihydroxy-palmitic acid	Lipids	Free fatty acids	3233-90-7	B	10637	22257	8849.6	7156.5	9435.8	9222.8	9	9	9	6158.9	11046	4653.3	4370.9	5109.6	5411	4322.3	--	--
pmn001688	295.23	7.97	296.214	C18H32O3	[M-H]-	9S-Hyroxy-10E,12E-octadecadienoic acid	Lipids	Free fatty acids	-	A	378460	299030	285700	238610	481080	233900	861070	1123200	1069400	238620	482680	343410	1315000	1342200	1389100	1316600	--	--
pmn001694	329.23	6.41	330.217	C18H34O5	[M-H]-	9,10,13-Trihyroxy-11-octadecadienoic acid	Lipids	Free fatty acids	-	A	10501	8814.1	6287.6	9630.5	10232	13151	49719	55845	81720	9667.3	13855	9349.6	41606	42815	43441	42516	--	--
pmn001700	455.35	10.06	456.329	C30H48O3	[M-H]-	24,30-Dihydroxy-12(13)-enolupinol	Terpenoids	Triterpene	-	A	9	9	9	9	9	9	21810	11235	11970	9	9	9	10637	8653.9	7254.5	6034.2	--	--
pmn001702	461.08	4.25	462.062	C21H18O12	[M-H]-	Tetahydroxy-flavone-7-O-β-D-glucuronide	Flavonoids	Flavonoid	-	B	1304200	1793900	1166300	458380	504190	408780	9	9	9	829540	755730	914740	709820	691030	687320	797260	--	--
pmn001705	471.35	8.16	472.323	C30H48O4	[M-H]-	3,24-Dihydroxy-17,21-semiacetal-12(13)oleanolic fruit	Terpenoids	Triterpene	-	A	36529	47756	23875	59705	57369	34719	840630	782710	604070	15846	19898	21344	338050	375460	390040	362040	--	--
pmn001706	471.35	8.29	472.323	C30H48O4	[M-H]-	2-Hydroxyoleanolic acid	Terpenoids	Triterpene	26707-60-8	A	25745	55970	68562	22692	27674	20337	75363	80368	72260	20542	49030	29371	59322	51853	52027	52430	--	--
pmn001708	487.34	6.69	488.317	C30H48O5	[M-H]-	Asiatic acid	Terpenoids	Triterpene	464-92-6	A	5993.8	9436.9	9686.6	496.32	120.57	454.43	799.76	1297	219.62	1514.4	857.01	2902.1	1272	1451.8	1101.8	1077.4	C08617	--
pmn001710	521.13	4.18	522.114	C24H26O13	[M-H]-	Rosmarinyl Glucoside	Phenolic acids	Phenolic acids	-	A	7813600	9698000	11629000	9996100	3956800	8279400	2993000	2521200	2825500	8719800	8141000	8168100	6937100	6183600	6399200	5971700	--	--
pmn001728	289.08	4.4	290.112	C15H18N2O4	[M-H]-	N-Acetyl-DL-tryptophan	Amino acids and derivatives	Amino acids and derivatives	87-32-1	B	53324	48697	59031	28434	28392	32829	790130	996680	845400	16765	22603	37412	601350	673450	646930	627040	--	--
pmn001738	403.1	3.77	404.111	C17H24O11	[M-H]-	Oleoside 11-methyl ester	Phenolic acids	Phenolic acids	60539-23-3	B	290440	141800	230060	224250	399240	273100	915760	895290	616230	266220	253020	150670	573970	641090	531890	524590	--	--
pmp000020	287.09	7.21	286.073	C16H14O5	[M+H]+	Oxypeucedanin	Lignans and Coumarins	Coumarins	737-52-0	B	59097	31568	61191	7734.9	20245	12482	9	9	9	23730	37149	11990	10381	11872	10436	11026	C09282	--
pmp000086	269.1	4.08	268.081	C13H16O6	[M+H]+	1-Feruloyl-sn-glycerol	Phenolic acids	Phenolic acids	-	B	5453.4	5701.9	3170.8	9003.9	6762.9	8265	222160	297670	218280	3826.5	7561.1	5254.4	96295	136660	133010	126810	--	--
pmp000100	867.21	3.4	866.172	C45H38O18	[M+H]+	Arecatannin B1	Tannins	Proanthocyanidins	79763-28-3	A	27792	35705	18935	32354	40104	34965	634.39	1405.2	5651.7	30650	24763	24050	28155	28187	24890	24984	C17892	--
pmp000101	867.21	3.8	866.172	C45H38O18	[M+H]+	Arecatannin C1	Tannins	Proanthocyanidins	87727-69-3	A	10780	11332	10035	12187	18503	9043.4	9	9	9	8063.2	9993.8	11981	6114.4	5719.6	5795	6069.6	C17897	--
pmp000102	1155.27	3.22	1154.22	C60H50O24	[M+H]+	Arecatannin A1	Tannins	Proanthocyanidins	-	A	18307	30840	13300	16496	33436	20212	106.87	109.98	459.63	16329	10670	21143	17183	18359	14437	13275	C17894	--
pmp000103	1155.27	3.32	1154.22	C60H50O24	[M+H]+	Arecatannin A2	Tannins	Proanthocyanidins	79763-29-4	A	23171	41847	16995	30631	37966	27696	122.78	429.28	540.32	24049	12251	19666	30231	25052	16222	24657	C17893	--
pmp000120	463.1	4.53	462.096	C22H22O11	[M+H]+	Diosmetin-6-C-glucoside	Flavonoids	Flavonoid	-	B	83307	72196	68135	23654	27460	15442	2074	3085.1	2051.7	39311	32079	35059	41422	32628	34475	27284	--	--
pmp000194	519.11	4.85	518.085	C24H22O13	[M+H]+	Malonyglygenistin	Flavonoids	Isoflavones	-	B	59547	153530	45280	14116	21830	19917	22763	30379	19305	29984	26448	26994	37043	29279	32080	24241	--	--
pmp000231	339.1	3.83	338.085	C16H18O8	[M+H]+	Trans-3-O-p-coumaric quinic acid	Phenolic acids	Phenolic acids	-	A	7341700	6312100	6478000	2653000	3744000	4003100	120590	51656	340640	4460300	5344200	5598400	2282600	2662000	2462700	2734500	--	--
pmp000232	339.1	3.36	338.085	C16H18O8	[M+H]+	Cis-3-p-coumaric quinic acid	Phenolic acids	Phenolic acids	-	A	2451400	1638800	2665500	405720	629780	454620	84903	60289	106450	1092200	1583600	3025900	1250800	1119400	1273000	1042000	--	--
pmp000248	205.09	6.14	204.07	C12H12O3	[M+H]+	3-Butylidene-7-hydroxyphthalide	Others	Others	93236-67-0	B	3206.7	3305.1	3748.8	3151.2	3940.2	3614.1	5838.7	5655.5	4837.5	4979.2	5164.8	3646.7	4389.9	4808.3	5232.9	3794.2	C09921	--
pmp000274	579.15	3.87	578.12	C30H26O12	[M+H]+	Procyanidin B3	Tannins	Proanthocyanidins	23567-23-9	B	326020	328800	194720	309970	270940	262600	9	9	16471	263990	218740	218160	131980	116570	125810	121140	--	--
pmp000284	223.06	4.78	222.044	C11H10O5	[M+H]+	Fraxidin	Lignans and Coumarins	Coumarins	525-21-3	A	340580	307330	415130	618400	583630	843330	10036000	12836000	11453000	508810	815530	786770	5349400	5377000	5225900	5294100	C17479	--
pmp000444	487.34	4.42	486.303	C30H46O5	[M+H]+	27,28-Dicarboxyl ursolic acid	Terpenoids	Triterpene	-	B	9	9	9	9	9	9	30071	27238	31683	9	9	9	30563	21907	22800	18543	--	--
pmp000446	531.23	4.5	530.199	C27H34N2O9	[M+H]+	22-O-Demethyl-22-O-β-D-glucopyranosyl isocorynoxeine	Alkaloids	Alkaloids	-	B	9051.3	5048.5	9579.6	7426	7088.9	12247	307830	362970	169160	6701.7	10088	8538.1	106430	145170	176010	145030	--	--
pmp000452	225.1	3.84	224.127	C13H20O3	[M+H]+	Annuionone D	Others	Others	-	A	173040	272990	194090	163120	218500	186220	13742	13399	7482.4	240470	202580	270160	131250	180560	157300	119530	--	--
pmp000460	284.1	5.37	283.108	C17H17NO3	[M+H]+	N-cis-Paprazine	Alkaloids	Phenolamine	-	B	937.43	1077.5	1272.6	1872	1610	1425.4	19465	11867	38902	1278.1	896.32	4016.7	12400	12883	14398	12438	--	--
pmp000544	355.1	3.39	354.079	C16H18O9	[M+H]+	Chlorogenic Acid	Phenolic acids	Phenolic acids	327-97-9	A	22868000	22914000	20300000	11976000	15127000	14485000	1654800	1858100	4389200	16184000	17277000	19123000	13100000	13526000	12850000	11582000	C00852	ko00940,ko00941,ko00945,ko01110
pmp000545	355.1	3.37	354.079	C16H18O9	[M+H]+	4-Caffeoylquinic acid	Phenolic acids	Phenolic acids	905-99-7	A	964030	1005300	969170	743510	904550	859260	114420	109160	279450	917410	963540	952610	864500	700730	678720	731260	--	--
pmp000562	257.1	6.14	256.064	C15H12O4	[M+H]+	Pinocembrin	Flavonoids	Dihydroflavone	480-39-7	A	162980	138480	206280	82281	133970	79701	228120	286880	244430	94167	112530	83316	156880	165370	166110	165260	C09827	ko00941
pmp000572	287.05	5.58	286.038	C15H10O6	[M+H]+	Luteolin	Flavonoids	Flavonoid	491-70-3	A	7536.4	9409	6843.5	6236.3	6715.8	5198.5	5220.8	5782.1	5478.1	6144.7	8142.1	5806.8	4817.1	5119.6	5588.5	5667.2	C01514	ko00941,ko00944,ko01100,ko01110
pmp000578	463.08	4.29	462.079	C25H18O9	[M+H]+	Luteolin-7-O-glucuronide	Flavonoids	Flavonoid	29741-10-4	B	4324000	4756500	3775000	1040600	1300300	886040	9	9	9	1726000	1649100	2280500	1806800	1605300	1905800	1325900	--	--
pmp000579	463.12	4.87	462.096	C22H22O11	[M+H]+	Diosmetin-7-O-galactoside	Flavonoids	Flavonoid	-	B	145210	177880	137110	116020	130650	122360	9	9	9	119650	114260	131610	59644	57798	56790	61622	--	--
pmp000580	465.1	4.31	464.076	C21H20O12	[M+H]+	Isoquercitrin(Quercetin 3-O-β-D-glucoside)	Flavonoids	Flavonols	482-35-9	A	16525000	11860000	12643000	2523000	2619600	2344000	484440	579440	753540	4623600	4343800	3906000	2341400	2450900	3618000	2444300	--	--
pmp000585	519.11	5.03	518.085	C24H22O13	[M+H]+	Apigenin-7-O-(6-O-Malonyl Glucoside)	Flavonoids	Flavonoid	-	B	9	9	9	9	9	9	24637	21348	25258	9	9	9	20891	23141	17066	16955	--	--
pmp000588	549.12	5.14	548.094	C25H24O14	[M+H]+	Diosmetin-7-O-(6'-O-malonyl)-β-D-glucoside	Flavonoids	Flavonoid	-	A	7392.6	4836.9	5992.5	10492	7582.1	9400.6	51897	48061	48228	8164.7	6097.5	5890.3	38784	37481	38881	39396	--	--
pmp000589	551.1	4.63	550.074	C24H22O15	[M+H]+	Quercetin-7-O-(6'-O-malonyl)-β-D-glucoside	Flavonoids	Flavonols	-	A	1470600	518290	1607900	152490	169360	120850	2712	3336.6	14392	324120	363930	341420	323080	272030	355600	240380	--	--
pmp000593	595.16	4.26	594.132	C27H30O15	[M+H]+	Luteolin-7-O-rutinoside	Flavonoids	Flavonoid	3563-98-2	A	1554400	1592600	1221400	189170	179800	163020	1504.5	2161.9	1970.7	410150	370030	902210	389870	349480	287870	244400	--	--
pmp000594	609.18	4.69	608.146	C28H32O15	[M+H]+	Diosmetin-7-O-rutin	Flavonoids	Flavonoid	-	B	57445	73157	43650	20142	15155	8026.2	905.78	1159.5	1711.4	20809	23278	27849	19746	19056	19430	13433	--	--
pmp000595	611.16	3.81	610.126	C27H30O16	[M+H]+	Luteolin-7,3'-Di-O-β-D-Glucoside	Flavonoids	Flavonoid	257-724-7	B	7094.5	5057.7	7212	15009	18370	22626	5089.3	7221.8	17327	12133	25512	7692.9	14600	13390	15454	16327	--	--
pmp000596	627.15	3.37	626.12	C27H30O17	[M+H]+	Quercetin 3,7-bis-O-β-D-glucoside	Flavonoids	Flavonols	-	A	126810	50431	153970	40631	23753	22603	1523.4	2287.8	3200.3	73654	33815	44582	46569	44141	40360	43545	--	--
pmp000781	619.39	8.99	618.355	C39H54O6	[M+H]+	p-Coumaroyleuscaphic acid	Terpenoids	Triterpene	-	B	913.18	616.48	760.4	1721.4	1517.1	738.94	18089	15697	16108	355.11	639.03	667.28	7904.5	8566.7	7522.1	6969.6	--	--
pmp000782	635.39	7.92	634.349	C39H54O7	[M+H]+	Caffeoyl hawthorn acid	Terpenoids	Triterpene	-	B	3848.4	2426.1	3845.9	6138	4713.6	2759.8	48212	46121	42104	1723.7	1104.3	2049.2	16532	17423	17634	15470	--	--
pmp000906	213.13	8.75	212.11	C15H16O	[M+H]+	Dihydroylindesteolene	Others	Others	-	A	8498.9	6553.3	8061.2	6711.3	4928.8	6198.8	1573.1	928.75	1453.9	7721	4125.1	3391.2	2849.7	2906.2	3705.1	2876.1	--	--
pmp000908	229.12	7.88	228.104	C15H16O2	[M+H]+	Dehydrocamphorlactone	Others	Others	-	A	8411300	8304400	7301900	7648000	6765600	7702000	3898200	4314200	4004100	7556000	9256600	8308700	5949300	6230100	6019800	5598700	--	--
pmp000912	247.03	6.81	246.113	C15H18O3	[M+H]+	Hydroxyindesteolide	Others	Others	-	A	280490	282780	370420	337580	297410	205860	54362	62906	65538	276240	184720	142740	173780	123680	140110	120630	--	--
pmp000967	205.1	3.01	204.08	C11H12N2O2	[M+H]+	Tryptophan	Amino acids and derivatives	Amino acids and derivatives	73-22-3	A	15473000	12436000	13869000	15247000	13536000	11522000	12852000	17550000	20985000	12079000	11136000	10826000	16357000	18362000	16442000	15958000	C00078	ko00260,ko00380,ko00400,ko00901,ko00966,ko00970,ko01100,ko01110,ko01210,ko01230
pmp001033	423.09	3.72	422.068	C19H18O11	[M+H]+	Isomangiferin	Others	Xanthone	24699-16-9	B	730600	673210	709970	426910	353330	529280	2654800	2695300	2412300	501570	423150	475750	2152000	1951500	1893300	1954300	--	--
pmp001074	287.09	7.49	286.073	C16H14O5	[M+H]+	Isosakuranetin	Flavonoids	Dihydroflavone	207-551-8	A	1138200	639020	1217200	267760	477740	340780	9529.5	7075	9226.9	609250	699370	285990	189880	204510	194700	167000	--	--
pmp001085	411.2	4.05	410.171	C21H30O8	[M+H]+	Onitin-2'-O-D-glucoside	Others	Others	76947-60-9	A	51699	40365	36698	52409	55054	32398	58994	59027	43750	57393	44438	47912	23128	25947	24584	29948	--	--
pmp001096	216.1	6.33	215.05	C12H9NO3	[M+H]+	Dictangustine A	Alkaloids	Alkaloids	-	B	6397.5	5492.5	7517.9	7841.3	7737.8	8576.3	789.13	2036.9	2363.2	6743.7	6599.2	5411.9	3937.6	4513.4	3773.1	4301.7	--	--
pmp001178	284.1	5.32	283.108	C17H17NO3	[M+H]+	N-cis-sinapoyltyramine	Alkaloids	Phenolamine	-	B	1068.2	1026.7	720.83	867.76	739.45	405.27	16627	12356	42669	217.21	1680.6	3352.7	11522	15491	10976	11583	--	--
pmp001188	625.3	6.5	624.219	C36H36N2O8	[M+H]+	C19	Alkaloids	Alkaloids	-	A	11202	22298	1220.8	2545.3	1959.4	3044.6	234120	143220	374940	1528.2	5016.3	184930	112740	126780	137410	130680	--	--
pmp001198	132.1	1.7	131.085	C6H13NO2	[M+H]+	6-Deoxyfagomine	Alkaloids	Alkaloids	197449-09-5	A	314480	368290	238590	397460	233250	401090	910310	930190	1123500	334230	373220	370610	848500	733990	647530	679230	--	--
pmp001200	314.1	5.41	313.117	C18H19NO4	[M+H]+	Methoxy-N-Caffeoyltyramine	Alkaloids	Phenolamine	-	A	6127.1	8953	2020	3097.8	3708.3	4360.2	356410	397060	675420	4997	10755	34007	332900	348190	372120	351590	--	--
pmp001201	162.1	1.24	161.094	C7H15NO3	[M+H]+	5-Aminocycloheptane-1,2,3-triol	Alkaloids	Alkaloids	-	B	2411.8	450.94	960.01	3686.8	1223	549.16	7907.9	6325.9	4272.7	1046.6	2626.8	2136.3	4388.6	6354.5	5818.5	5164.8	--	--
pmp001213	166.08	2.41	165.07	C9H11NO2	[M+H]+	Phenylalanine	Amino acids and derivatives	Amino acids and derivatives	63-91-2	A	10130000	10944000	6893100	8386300	6524700	8552200	16669000	18243000	20915000	12811000	16041000	17562000	20908000	18632000	17278000	17245000	C00079	ko00360,ko00400,ko00460,ko00940,ko00960,ko00966,ko00970,ko01100,ko01110,ko01210,ko01230,ko02010
pmp001249	428.19	2.47	428.168	C20H30NO9+	[M]+	Caffeoylcholine 6-glucoside	Alkaloids	Alkaloids	-	B	16075	10542	12192	5464.9	6214.9	8274	4464	4940	4238.1	5025.3	8506.4	10798	6845.6	8208.2	7745.5	8160.2	--	--
pmp001250	520.34	7.42	520.304	C26H51NO7P+	[M]+	PC(18:2)	Lipids	PC	-	A	141120	200760	170390	149640	223690	294680	3821600	3134000	3066500	104890	142210	127300	2403300	2633900	2710100	2392100	--	--
pmp001251	520.34	7.24	520.304	C26H51NO7P+	[M]+	PC(18:2)isomer	Lipids	PC	-	A	146310	213010	183140	155060	239370	273750	3650800	2851300	2983100	118930	133240	135070	2299900	2819600	2619800	2494300	--	--
pmp001255	314.14	5.26	313.131	C18H19NO4	[M+H]+	N-Trans-feruloyltyramine	Alkaloids	Phenolamine	66648-43-9	A	12015	18183	3521	5672.6	9760.9	10227	829590	746340	1288000	10430	22863	71990	661270	732450	713320	668440	C02717	--
pmp001256	314.14	5.41	313.131	C18H19NO4	[M+H]+	N-Cis-feruloyltyramine	Alkaloids	Phenolamine	80510-09-4	A	11568	18983	3191.7	4815.8	6120.7	9021.8	887270	823200	1333600	11416	22618	75903	640780	729770	662010	680700	--	--
pmp001264	274.28	6.5	273.243	C16H35NO2	[M+H]+	Hexadecylsphingosine	Lipids	Sphingolipids	-	A	10624000	8432600	11131000	10139000	8021200	8755700	10067000	12513000	9398700	11112000	11820000	11979000	12670000	10796000	10289000	10146000	--	--
pmp001266	280.26	7.18	279.235	C18H33NO	[M+H]+	Crucigasterin E	Others	Others	-	A	126990	107910	112750	91922	124710	115180	65189	61000	72366	138070	120030	98414	64184	76691	63301	62877	--	--
pmp001270	494.33	7.08	493.282	C24H48NO7P	[M+H]+	LysoPC(16:2)	Lipids	LPC	-	A	278080	323980	305120	227820	357640	371050	10878000	6339800	7706800	169630	209790	245280	5349200	5298100	5343300	4939900	--	--
pmp001272	478.29	7.4	477.253	C23H44NO7P	[M+H]+	3-{(2-Aminoethoxy)(hydroxy)phosphoryl]oxy}-2-12-octadecadienoate	Alkaloids	Alkaloids	-	A	210940	333030	344290	223410	479020	443310	3008500	2371100	2245400	147530	205280	223700	1923000	2066300	1892200	1931300	--	--
pmp001273	520.34	7.43	519.296	C26H50NO7P	[M+H]+	LysoPC(18:2)	Lipids	LPC	-	A	150310	196340	182490	144810	231060	291160	3613300	3175300	3185200	104280	132690	127780	2463600	2651100	2659000	2285600	--	--
pmp001274	542.32	7.43	541.282	C28H48NO7P	[M+H]+	2-Hydroxy-5,8,11,14,17-icosapentaenoyloxy ]propyl-2-(trimethylammonio)ethyl phosphate	Alkaloids	Alkaloids	-	A	97563	90612	43005	46199	68379	79545	1090700	686200	1206300	77469	90348	92108	923600	957360	742650	562670	--	--
pmp001275	672.42	7.7	671.363	C31H61O14N	[M+H]+	3-Hydroxypropyl palmitate glc-glucosamine	Alkaloids	Alkaloids	-	A	375720	270460	371900	210650	367330	215660	452470	329240	486160	205770	456680	341350	413420	415330	426340	439640	--	--
pmp001276	677.37	7.7	676.324	C33H56O14	[M+H]+	2,3-Dihydroxypropyl-9,12,15-octadecatrienoate-hexose-hexose	Lipids	Free fatty acids	-	A	177450	116620	175780	104160	193490	113960	153510	127050	172870	117980	269740	200920	166860	141460	199210	209530	--	--
pmp001277	454.3	7.76	453.253	C21H44NO7P	[M+H]+	3-{(2-Aminoethoxy)(hydroxy)phosphoryl]oxy}-2-hydroxypropyl palmitate	Alkaloids	Alkaloids	-	A	321560	253080	265340	162850	244270	177960	1592600	1165100	1520300	214570	324730	245380	973840	887740	819430	838450	--	--
pmp001278	496.34	7.81	495.296	C24H50NO7P	[M+H]+	LysoPC(16:1)	Lipids	LPC	-	A	1973000	1466300	1186700	911300	1221600	860040	24503000	14727000	20039000	1339700	1784300	1599700	9564600	9332500	8107300	8644200	--	--
pmp001281	522.36	8.12	521.311	C26H52NO7P	[M+H]+	LysoPC(18:1)	Lipids	LPC	-	A	169770	232980	277390	143140	296790	281220	7762400	4624900	4601900	92963	98654	145750	4464800	4256700	4326600	3955700	--	--
pmp001282	544.34	8.12	543.296	C28H50NO7P	[M+H]+	Propyl2-(trimethylammonio)ethyl phosphate	Others	Others	-	A	77711	113510	116900	73792	159660	144150	4118700	2723900	2693900	44166	43427	70824	2316800	2213200	2083400	2075500	--	--
pmp001283	355.29	8.23	354.251	C21H38O4	[M+H]+	Glyceryl linoleate	Lipids	Glycerol ester	26545-74-4	A	28970	24734	34267	26682	34679	31961	62768	33734	50021	24180	33608	21392	53230	47333	41807	39754	--	--
pmp001285	149.02	8.71	148.012	C8H4O3	[M+H]+	Phthalic anhydride	Phenolic acids	Phenolic acids	85-44-9	A	1188900	1100000	1661200	1482300	1143100	1225900	2577900	1679600	2298700	1014800	713950	1086600	1891700	1753500	1767700	1570100	--	--
pmp001286	524.37	8.95	523.325	C26H54NO7P	[M+H]+	LysoPC(18:0)	Lipids	LPC	-	A	100250	71039	44199	43285	74242	46779	1249500	682230	875520	79882	126460	116640	375480	394940	362760	345100	--	--
pmp001287	120.08	2.42	119.067	C8H9N	[M+H]+	N-Benzylmethylene isomethylamine	Alkaloids	Alkaloids	-	A	725030	762800	485580	591560	464590	650320	1148300	1362600	1552700	888700	1132300	1253300	1195800	1126200	1052900	1052800	--	--
pmp001309	465.1	4.15	464.076	C21H20O12	[M+H]+	6-Hydroxykaempferol-7-O-glucoside	Flavonoids	Flavonols	-	A	28243000	21897000	24598000	4644700	5651600	5019800	254660	262830	398190	9706100	9641900	6392700	4866900	6537500	7602500	5312500	--	--
pmp001310	627.2	3.82	626.12	C27H30O17	[M+H]+	6-Hydroxykaempferol-3,6-O-Diglucoside	Flavonoids	Flavonols	-	B	124320	72165	93885	22009	13465	15373	2858.8	2450.3	1650.4	23242	21510	15697	25408	27866	26904	23157	--	--
pmp001311	627.2	3.38	626.12	C27H30O17	[M+H]+	6-Hydroxykaempferol-7,6-O-Diglucoside	Flavonoids	Flavonols	-	A	122060	66387	115850	38112	23533	24348	2304.1	1227.8	2926.9	30372	23391	37985	56502	57476	38312	41307	--	--
